# Supplementary material for: Squamation and ecology of thelodonts
Source: PLoS One. 2017 Feb 27;12(2):e0172781. doi: 10.1371/journal.pone.0172781 (PMC5328365; doi:10.1371/journal.pone.0172781)
Supplement: S7 Table — (XLSX) [file pone.0172781.s007.xlsx]

## Sheet: S7 Table
S7 Table. Numerical values for discriminant variables measured on shark scales of unknown morphotype (and functional type) and detailed results of the classification after their inclusion in Canonical Variate Analysis-1 (CVA-1, with eight scale morphotypes as defined groups and ten size-free variables of the crown surface as discriminant variables).
Registration number	Species	Discriminant variables										HIGHEST GROUP						SECOND HIGHEST GROUP
												Predicted functional type	Predicted morphotype	Conditional probability [P(D>d | G=g)]		Posterior probability [P(G=g | D=d)]	Squared Mahalanobis distance to centroid	Predicted functional type	Predicted morphotype	Posterior probability [P(G=g | D=d)]	Squared Mahalanobis distance to centroid
		Circularity	Roundness	Solidity	MLC/MWC	RLA/MLC	RLA2/ACS	(MLC*MWC)/ACS	LLR/MLC	(LLR-LSR)/MLC	CP/MLC			p	df
-	Scyliorhinus canicula	0.97	0.93	1	0.923828	0	0	1.37952	0	0	3.1945	Abrasive	6	0.395159	7	1	7.3319	Bioluminesc.	1	1.2458e-09	48.3389
-	Scyliorhinus canicula	0.61	0.63	0.89	1.71538	0.638266	1.19251	1.70647	0.935725	0.681614	2.65172	Generalized	8	0.985327	7	0.999998	1.40793	Abrasive	7	1.52326e-06	28.1972
-	Scyliorhinus canicula	0.6	0.48	0.89	2.27737	0.657051	1.79533	1.82605	0.940171	0.605769	2.25321	Generalized	8	0.500565	7	0.999999	6.34081	Abrasive	7	4.90889e-07	35.3949
-	Scyliorhinus canicula	0.87	0.88	0.97	1.20923	0	0	1.53348	0	0	2.79898	Abrasive	6	0.89574	7	1	2.88154	Bioluminesc.	1	3.72557e-07	32.4873
-	Scyliorhinus canicula	0.88	0.91	0.99	1.05011	0	0	1.62981	0	0	2.88382	Abrasive	6	0.768683	7	1	4.09577	Bioluminesc.	1	1.39931e-07	35.66
-	Mustelus mustelus	0.96	0.91	1	0.990499	0	0	1.31145	0	0	3.17506	Abrasive	6	0.562076	7	1	5.81022	Bioluminesc.	1	4.70405e-10	48.7651
-	Mustelus mustelus	0.64	0.51	0.92	1.98953	0.652632	1.4399	1.69921	0.968421	0.631579	2.40263	Generalized	8	0.926052	7	1	2.51383	Abrasive	7	3.79697e-07	32.0816
-	Mustelus mustelus	0.86	0.64	1	1.53846	0	0	1.38031	0	0	2.62059	Abrasive	6	0.944883	7	1	2.24748	Bioluminesc.	3	1.70392e-08	38.023
-	Mustelus mustelus	0.89	0.67	1	1.46256	0	0	1.36484	0	0	2.65663	Abrasive	6	0.899198	7	1	2.8423	Bioluminesc.	1	3.68307e-09	41.6813
MCTA-00090	Sphyrna zygaena	0.9	0.74	0.98	0.708171	0	0	1.29471	0	0	3.8956	Abrasive	6	0.900977	7	1	2.82188	Bioluminesc.	1	4.04836e-10	46.077
MCTA-00090	Sphyrna zygaena	0.9	0.88	0.96	1.20202	0.621849	0.737384	1.5864	1	0.634454	2.78992	Hydrodynamic	5	0.0769263	7	0.955931	12.808	Generalized	8	0.0440386	18.9633
MCTA-00092	Squatina aculeata	0.67	0.8	0.83	1.38127	0.786925	1.40102	1.63794	0.924939	0.38862	3.08111	Abrasive	7	0.00278478	7	0.51229	21.7683	Generalized	8	0.445352	22.0484
MCTA-00092	Squatina aculeata	0.9	0.8	0.99	1.22833	0	0	1.43772	0	0	2.77281	Abrasive	6	0.872237	7	1	3.13502	Bioluminesc.	1	1.62488e-08	39.0055
MCTA-00093	Scyliorhinus stellaris	0.77	0.8	0.95	0.858998	0	0	1.61064	0	0	3.42657	Abrasive	6	0.985013	7	0.999999	1.41801	Bioluminesc.	1	7.93408e-07	29.5119
MCTA-00093	Scyliorhinus stellaris	0.76	0.89	0.96	0.936937	0.596154	0.495983	1.4895	0.781593	0.306319	3.44231	Abrasive	7	0.738932	7	0.999337	4.34802	Generalized	8	0.000650482	19.0223
MCTA-00093	Scyliorhinus stellaris	0.57	0.72	0.86	1.55696	0.672087	1.12729	1.60291	0.917344	0.45122	2.97561	Generalized	8	0.894398	7	0.999984	2.89662	Abrasive	7	1.63103e-05	24.944
MCTA-00093	Scyliorhinus stellaris	0.91	0.82	1	1.16141	0	0	1.50359	0	0	2.80999	Abrasive	6	0.76388	7	1	4.13691	Bioluminesc.	1	1.29865e-08	40.4556
MCTA-00093	Scyliorhinus stellaris	0.73	0.71	0.91	1.4916	0.305634	0.227562	1.63323	0.328169	0.043662	2.65211	Abrasive	6	2.14277e-05	7	0.82771	33.4927	Abrasive	7	0.17162	36.6394
MCTA-00098	Mustelus asterias	0.93	0.82	1	0.87191	0	0	1.46663	0	0	3.25515	Abrasive	6	0.73701	7	1	4.36413	Bioluminesc.	1	2.84583e-09	43.719
MCTA-00098	Mustelus asterias	0.96	0.96	1	0.899736	0.445748	0.239449	1.33943	0.636364	0.331378	3.29619	Abrasive	7	0.51318	7	0.999977	6.22987	Hydrodynamic	5	2.24012e-05	27.6426
MCTA-00098	Mustelus asterias	0.8	0.81	0.96	1.40393	0.572317	0.813338	1.76869	0.92535	0.671851	2.51944	Generalized	8	0.200764	7	0.996528	9.79043	Hydrodynamic	5	0.0032523	21.2403
MCTA-00098	Mustelus asterias	0.82	0.74	0.98	1.66265	0	0	1.87031	0	0	2.22283	Abrasive	6	0.0640322	7	0.999852	13.3497	Bioluminesc.	1	0.000147123	30.9979
MCTA-00098	Mustelus asterias	0.9	0.83	1	1.31765	0	0	1.47752	0	0	2.6808	Abrasive	6	0.777986	7	1	4.01554	Bioluminesc.	1	1.65532e-08	39.8489
MCTA-00230	Etmopterus spinax	0.83	0.88	0.96	1.15625	0	0	1.55672	0	0	2.89961	Abrasive	6	0.991018	7	0.999999	1.19602	Bioluminesc.	1	8.82572e-07	29.0769
MCTA-00230	Etmopterus spinax	0.48	0.26	0.83	2.90909	0	0	1.66222	0	0	2.33203	Bioluminesc.	3	0.150431	7	0.999929	10.7387	Bioluminesc.	1	7.02527e-05	29.8654
MCTA-00230	Etmopterus spinax	0.3	0.14	0.96	7.125	0	0	1.32633	0	0	2.10819	Bioluminesc.	2	0.00304199	7	1	21.545	Bioluminesc.	3	0	105.992
MCTA-00424	Atelomycterus marmoratus	0.93	0.91	1	0.912605	0	0	1.41683	0	0	3.22652	Abrasive	6	0.79663	7	1	3.85225	Bioluminesc.	1	1.47406e-09	44.5227
MCTA-00424	Atelomycterus marmoratus	0.73	0.65	0.92	1.56667	0.874113	1.78055	1.48745	0.95922	0.23227	2.6844	Abrasive	7	0.00066123	7	0.736274	25.3367	Hydrodynamic	5	0.261879	27.4042
MCTA-00424	Atelomycterus marmoratus	0.83	0.8	0.96	1.12201	0	0	1.69827	0	0	2.8145	Abrasive	6	0.84078	7	0.999992	3.44726	Bioluminesc.	1	7.58744e-06	27.0253
MCTA-00434	Deania calcea	0.91	0.87	0.97	1.10843	0	0	1.35522	0	0	3.03478	Abrasive	6	0.800383	7	1	3.81891	Bioluminesc.	1	2.26906e-08	39.0215
MCTA-00434	Deania calcea	0.57	0.86	0.81	0.941452	1	1.92583	2.04559	1	0	3.38308	Defensive	4	0.000465064	7	1	26.1937	Abrasive	7	2.78775e-10	70.1949
MCTA-00434	Deania calcea	0.35	0.85	0.61	1.1058	1	3.23969	2.92972	1	0	3.21811	Defensive	4	0.265345	7	1	8.82662	Generalized	8	0	173.925
MCTA-00434	Deania calcea	0.83	0.57	1	1.65608	0.814696	1.57134	1.42953	0.894569	0.129393	2.52556	Abrasive	7	0.0050883	7	0.895092	20.2327	Hydrodynamic	5	0.104906	24.5205
MCTA-00434	Deania calcea	0.43	0.73	0.73	1.44065	0.746567	1.82212	2.26925	0.935081	0.400749	3	Generalized	8	0.000311774	7	0.999994	27.1609	Defensive	4	5.69737e-06	51.3119
MCTA-00459	Etmopterus bigelowi	0.51	0.83	0.72	1.01215	0	0	1.29033	0	0	3.7	Bioluminesc.	1	1.24638e-06	7	0.889313	40.0225	Abrasive	6	0.110687	44.19
MCTA-00459	Etmopterus bigelowi	0.61	0.77	0.81	0.872428	0	0	1.74672	0	0	3.67925	Bioluminesc.	1	0.149982	7	0.722806	10.7483	Abrasive	6	0.277194	12.6651
MCTA-00471	Chiloscillium puntatum	0.87	0.8	0.99	1.14963	0	0	1.64896	0	0	2.75644	Abrasive	6	0.733835	7	1	4.39071	Bioluminesc.	1	2.67664e-07	34.6578
MCTA-00471	Chiloscillium puntatum	0.87	0.8	0.97	1.23439	0.278638	0.142148	1.48322	0.408669	0.27967	2.81631	Abrasive	7	0.00176693	7	0.999893	22.9104	Abrasive	6	0.000106986	41.1958
MCTA-00477	Isistius brasiliensis	0.57	0.9	0.78	1.08984	0	0	2.03175	0	0	3.15412	Bioluminesc.	1	0.957949	7	0.999898	2.03374	Abrasive	6	0.000101593	20.4226
MCTA-00477	Isistius brasiliensis	0.95	0.93	1	1.11333	0	0	1.12843	0	0	3.23952	Abrasive	6	0.634119	7	1	5.21192	Bioluminesc.	1	3.54838e-11	53.3358
MCTA-00487	Ginglyomostoma cirratum	0.96	0.88	1	1.52234	0	0	0.884917	0	0	3.11964	Abrasive	6	0.16411	7	1	10.4572	Bioluminesc.	1	3.65348e-12	63.1279
MCTA-00487	Ginglyomostoma cirratum	0.88	0.7	0.97	0.901437	0.526196	0.373692	1.49721	0.76082	0.446469	3.25285	Abrasive	7	0.771166	7	0.997374	4.07443	Hydrodynamic	5	0.00235427	16.1722
MCTA-00495	Carcharhinus melanopterus	0.97	0.86	1	0.963889	0	0	1.2974	0	0	3.21326	Abrasive	6	0.456791	7	1	6.73679	Bioluminesc.	1	3.92227e-10	50.0551
MCTA-00495	Carcharhinus melanopterus	0.91	0.97	0.97	1.06093	0.621622	0.597087	1.45646	1	0.692568	2.99324	Hydrodynamic	5	0.0692686	7	0.952163	13.1187	Generalized	8	0.0477569	19.1039
MCTA-00495	Carcharhinus melanopterus	0.92	0.86	1	1.15234	0	0	1.39847	0	0	2.90508	Abrasive	6	0.834411	7	1	3.50768	Bioluminesc.	1	2.64996e-09	43.0051
MCTA-00502	Scyliorhinus haeklelii	0.91	0.98	0.98	1.02961	0	0	1.52271	0	0	2.97604	Abrasive	6	0.708423	7	1	4.60183	Bioluminesc.	1	8.15522e-08	37.2459
MCTA-00502	Scyliorhinus haeklelii	0.87	0.71	0.98	1.18914	0.352697	0.236939	1.60176	0.526971	0.298755	2.75934	Abrasive	7	0.0903346	7	1	12.326	Generalized	8	3.88506e-07	41.8479
MCTA-00502	Scyliorhinus haeklelii	0.69	0.66	0.9	1.66226	0.629966	1.10126	1.66938	0.905789	0.527809	2.55505	Generalized	8	0.989242	7	0.999721	1.26933	Abrasive	7	0.000267725	17.7199
MCTA-00502	Scyliorhinus haeklelii	0.8	0.65	0.99	1.7027	0	0	1.53056	0	0	2.45238	Abrasive	6	0.79451	7	0.999992	3.871	Bioluminesc.	3	8.19287e-06	27.2955
MCTA-00502	Scyliorhinus haeklelii	0.88	0.65	1	1.47235	0	0	1.40403	0	0	2.63067	Abrasive	6	0.907433	7	1	2.74636	Bioluminesc.	1	6.66848e-09	40.3981
MCTA-00505	Galeorhinus galeus	0.96	0.97	1	1.04459	0	0	1.26691	0	0	3.14329	Abrasive	6	0.569587	7	1	5.74695	Bioluminesc.	1	3.00273e-10	49.5996
MCTA-00505	Galeorhinus galeus	0.69	0.61	0.93	1.69758	0.760095	1.54099	1.5712	1	0.39905	2.61045	Generalized	8	0.648452	7	0.998042	5.09434	Hydrodynamic	5	0.00099925	18.9074
MCTA-00505	Galeorhinus galeus	0.6	0.66	0.89	1.68831	1	2.66945	1.58114	1	0	2.68205	Defensive	4	4.88147e-06	7	0.999999	36.9086	Abrasive	7	1.01378e-06	64.5122
MCTA-00505	Galeorhinus galeus	0.91	0.75	1	1.44144	0	0	1.39876	0	0	2.7125	Abrasive	6	0.716491	7	1	4.53507	Bioluminesc.	1	8.23086e-09	41.7658
MCTA-00506	Squalus acanthias	0.85	0.75	0.98	1.22026	0	0	1.44551	0	0	2.89961	Abrasive	6	0.997828	7	1	0.760288	Bioluminesc.	1	2.9293e-08	35.4521
MCTA-00506	Squalus acanthias	0.43	0.41	0.79	2.24103	1	4.911	2.19141	1	0	2.45309	Defensive	4	0.000153408	7	1	28.8605	Generalized	8	0	168.717
MCTA-00507	Prionace glauca	0.91	0.95	0.99	1.04167	0	0	1.03205	0	0	3.58769	Abrasive	6	0.660512	7	1	4.9955	Bioluminesc.	1	8.9189e-12	55.8812
MCTA-00507	Prionace glauca	0.9	0.68	0.99	1.44136	0.736617	0.921369	1.17809	1	0.466809	2.86724	Hydrodynamic	5	0.869739	7	0.998252	3.1608	Abrasive	7	0.00144872	16.2314
MCTA-00507	Prionace glauca	0.86	0.67	0.99	1.35747	0	0	1.33621	0	0	2.84333	Abrasive	6	0.994402	7	1	1.02579	Bioluminesc.	1	3.43723e-09	40.003
MCTA-00508	Isurus oxyrinchus	0.96	0.89	1	1.01081	0	0	1.28049	0	0	3.17647	Abrasive	6	0.574396	7	1	5.70659	Bioluminesc.	1	3.11593e-10	49.4852
MCTA-00508	Isurus oxyrinchus	0.98	0.88	1	0.90625	0.821839	0.779217	1.27303	1	0.367816	3.33333	Hydrodynamic	5	0.555773	7	0.999961	5.86352	Abrasive	7	3.9255e-05	26.1543
MCTA-00508	Isurus oxyrinchus	0.86	0.58	1	1.3869	0	0	1.13284	0	0	3.04292	Abrasive	6	0.926645	7	1	2.506	Bioluminesc.	3	2.51285e-09	42.1097
MCTA-00509	Pristiophorus cirratus	0.9	0.79	0.97	1.22549	0	0	0.848557	0	0	3.664	Abrasive	6	0.200764	7	1	9.79042	Bioluminesc.	1	7.16161e-12	61.115
MCTA-00509	Pristiophorus cirratus	0.7	0.77	0.88	1.22911	1	1.89487	1.54166	1	0	3.08991	Defensive	4	3.40763e-08	7	0.935611	48.0975	Hydrodynamic	5	0.0371085	54.5523
MCTA-00509	Pristiophorus cirratus	0.88	0.84	1	1.0544	0	0	1.57455	0	0	2.9312	Abrasive	6	0.881281	7	1	3.03996	Bioluminesc.	1	1.8418e-08	38.6598
MCTA-00510	Carcharhinus sorrah	0.86	0.66	1	1.26861	0	0	1.48067	0	0	2.79337	Abrasive	6	0.971406	7	1	1.77134	Bioluminesc.	1	8.49153e-09	38.9397
MCTA-00510	Carcharhinus sorrah	0.97	0.93	1	0.922414	0.785047	0.712529	1.25339	1	0.448598	3.34579	Hydrodynamic	5	0.91952	7	0.999929	2.59823	Abrasive	7	7.1282e-05	21.6958
MCTA-00510	Carcharhinus sorrah	0.85	0.95	0.96	0.952899	0	0	1.54755	0	0	3.1749	Abrasive	6	0.985055	7	1	1.41666	Bioluminesc.	1	3.80144e-07	30.9821
MCTA-00511	Dalatias licha	0.93	0.96	0.99	1.00287	0.374286	0.202864	1.44396	0.477143	0.202857	3.05714	Abrasive	7	0.0737061	7	1	12.9351	Hydrodynamic	5	1.57366e-09	53.4748
MCTA-00511	Dalatias licha	0.63	0.87	0.81	0.810373	0.826	1.09676	1.98365	1	0.298	3.532	Generalized	8	0.000740168	7	0.63554	25.0609	Hydrodynamic	5	0.318795	26.4407
MCTA-00511	Dalatias licha	0.49	0.85	0.71	1.22467	0	0	2.48559	0	0	2.89928	Bioluminesc.	1	0.948468	7	1	2.19178	Abrasive	6	5.06253e-11	49.6049
MCTA-00511	Dalatias licha	0.83	0.82	0.99	1.2344	0.355117	0.267488	1.71833	0.480888	0.210851	2.66461	Abrasive	7	0.0305112	7	1	15.4621	Generalized	8	4.63362e-09	53.842
MCTA-00512	Sphyrna tiburo	0.94	0.87	1	0.906404	0	0	1.21767	0	0	3.47283	Abrasive	6	0.776827	7	1	4.02558	Bioluminesc.	1	5.97313e-11	51.1079
MCTA-00512	Sphyrna tiburo	0.95	0.77	1	1.36364	0.808333	1.18617	1.33127	1	0.3125	2.70417	Hydrodynamic	5	0.652495	7	0.999937	5.0612	Abrasive	7	6.33714e-05	24.3941
MCTA-00512	Sphyrna tiburo	0.92	0.82	1	1.22754	0	0	1.16891	0	0	3.08293	Abrasive	6	0.864474	7	1	3.21451	Bioluminesc.	1	8.22066e-11	49.6581
MCTA-00513	Chiloscillium puntatum	0.92	0.86	1	0.937984	0	0	1.43084	0	0	3.19559	Abrasive	6	0.859778	7	1	3.26176	Bioluminesc.	1	1.76786e-09	43.5687
MCTA-00513	Chiloscillium puntatum	0.77	0.72	0.95	1.443	0	0	1.56924	0	0	2.68172	Abrasive	6	0.979344	7	0.999995	1.58176	Bioluminesc.	1	4.94192e-06	26.0173
MCTA-00516	Sphyrna tiburo	0.97	0.85	1	0.862205	0	0	1.2603	0	0	3.46119	Abrasive	6	0.489848	7	1	6.43609	Bioluminesc.	1	1.31394e-10	51.9417
MCTA-00516	Sphyrna tiburo	0.97	0.88	1	0.971264	0.852071	0.871114	1.23534	1	0.266272	3.28994	Hydrodynamic	5	0.197382	7	0.999917	9.84749	Abrasive	7	8.25291e-05	28.652
MCTA-00516	Sphyrna tiburo	0.85	0.71	0.98	1.18725	0	0	1.42443	0	0	2.95302	Abrasive	6	0.999389	7	1	0.515272	Bioluminesc.	1	1.56511e-08	36.4607
MCTA-00518	Hexanchus griseus	0.91	0.93	1	1.17647	0	0	1.37271	0	0	2.91964	Abrasive	6	0.915013	7	1	2.65459	Bioluminesc.	1	1.63638e-09	43.1162
MCTA-00518	Hexanchus griseus	0.64	0.92	0.87	1.18483	0.694	0.908137	1.59138	1	0.536	3.236	Generalized	8	0.957274	7	0.999997	2.04559	Abrasive	7	2.23481e-06	28.0683
MCTA-00518	Hexanchus griseus	0.92	0.87	1	1.11091	0	0	1.39513	0	0	2.96399	Abrasive	6	0.850332	7	1	3.35505	Bioluminesc.	1	2.23137e-09	43.1964
MCTA-00519	Galeus melastomus	0.85	0.8	0.94	0.913295	0	0	1.50559	0	0	3.28481	Abrasive	6	0.955744	7	0.999999	2.07207	Bioluminesc.	1	1.29855e-06	29.1806
MCTA-00519	Galeus melastomus	0.53	0.73	0.86	1.65116	0.7277	1.33198	1.52337	1	0.413146	3.06103	Generalized	8	0.609801	7	1	5.41214	Abrasive	7	1.43714e-07	36.923
MCTA-00519	Galeus melastomus	0.35	0.65	0.67	1.69101	0.631229	1.57876	2.34313	1	0.578073	2.9402	Generalized	8	1.24249e-06	7	1	40.0296	Abrasive	7	2.49752e-15	107.277
MCTA-00519	Galeus melastomus	0.88	0.67	1	1.43506	0	0	1.38175	0	0	2.67873	Abrasive	6	0.937241	7	1	2.36035	Bioluminesc.	1	4.20611e-09	40.9338
MOVI-24582	Heptraquias perlo	0.87	0.89	0.99	1.06513	0	0	1.55537	0	0	2.94604	Abrasive	6	0.938905	7	1	2.33639	Bioluminesc.	1	4.26187e-08	36.2783
MOVI-24582	Heptraquias perlo	0.81	0.65	0.98	1.63922	0.552632	0.889943	1.77769	1	0.727273	2.30622	Generalized	8	0.00502659	7	0.999859	20.2641	Hydrodynamic	5	0.000141193	37.9946
MOVI-24582	Heptraquias perlo	0.91	0.74	1	1.27273	0	0	1.20246	0	0	3	Abrasive	6	0.915412	7	1	2.64967	Bioluminesc.	1	1.43434e-10	47.98
MOVI-24633	Carcharhinus brevipinna	0.98	0.98	1	1.01404	0	0	1.33202	0	0	3.07756	Abrasive	6	0.301415	7	1	8.36617	Bioluminesc.	1	8.95841e-10	50.0327
MOVI-24633	Carcharhinus brevipinna	0.9	0.77	1	0.785276	0.695312	0.583102	1.5359	1	0.628906	3.40625	Hydrodynamic	5	0.760837	7	0.999504	4.16289	Abrasive	7	0.000368037	19.9765
MOVI-24633	Carcharhinus brevipinna	0.94	0.95	0.99	0.929412	0	0	1.33938	0	0	3.28481	Abrasive	6	0.718218	7	1	4.52075	Bioluminesc.	1	1.33857e-09	45.3841
MOVI-24648	Carcharhinus brachyurus	0.95	0.82	1	1.08299	0	0	1.27266	0	0	3.09195	Abrasive	6	0.671949	7	1	4.90177	Bioluminesc.	1	3.18453e-10	48.6369
MOVI-24648	Carcharhinus brachyurus	0.93	0.78	0.99	0.845878	0.792373	0.751424	1.41487	1	0.338983	3.35593	Hydrodynamic	5	0.954418	7	0.99984	2.09461	Abrasive	7	0.000159711	19.5786
MOVI-24680	Mustelus schmitti	0.94	0.93	1	1.0445	0	0	1.44645	0	0	2.96861	Abrasive	6	0.606404	7	1	5.44022	Bioluminesc.	1	4.74836e-09	43.7712
MOVI-24680	Mustelus schmitti	0.89	0.79	0.99	1.23669	0.397129	0.301419	1.54542	0.45933	0.129187	2.72488	Abrasive	7	0.0327934	7	1	15.2612	Hydrodynamic	5	2.06184e-10	59.8657
MOVI-24680	Mustelus schmitti	0.68	0.54	0.94	1.90189	0.668651	1.30255	1.53183	0.956349	0.535714	2.5119	Generalized	8	0.968591	7	0.999959	1.83116	Abrasive	7	3.81132e-05	22.181
MOVI-24680	Mustelus schmitti	0.72	0.54	0.96	1.7931	0.367521	0.358585	1.48055	0.517094	0.299145	2.55769	Abrasive	7	0.00332644	7	0.999976	21.3184	Generalized	8	2.36289e-05	42.6244
MOVI-24680	Mustelus schmitti	0.91	0.69	1	1.54717	0	0	1.47243	0	0	2.45935	Abrasive	6	0.447989	7	1	6.81878	Bioluminesc.	1	4.2198e-08	40.7806
MZB 050881	Squalus blainvillei	0.96	0.84	1	1.23418	0	0	1.37205	0	0	2.77436	Abrasive	6	0.364112	7	1	7.65377	Bioluminesc.	1	3.57205e-09	46.554
MZB 050881	Squalus blainvillei	0.56	0.63	0.84	1.61724	1	3.5532	2.19708	1	0	2.52452	Defensive	4	0.265248	7	1	8.82793	Abrasive	7	0	116.34
MZB 83-2739	Apristurus nasutus	0.94	0.74	0.99	1.27624	0	0	1.39337	0	0	2.74459	Abrasive	6	0.461357	7	1	6.69459	Bioluminesc.	1	1.38151e-08	42.8896
MZB 83-2739	Apristurus nasutus	0.84	0.74	0.96	1.41121	0.576159	0.641237	1.3688	0.887417	0.509934	2.79139	Generalized	8	0.240448	7	0.912182	9.17336	Abrasive	7	0.0537508	14.8363
MZB 83-2739	Apristurus nasutus	0.87	0.96	0.99	0.927273	0	0	1.56578	0	0	3.14902	Abrasive	6	0.943777	7	1	2.26429	Bioluminesc.	1	2.75634e-08	37.0778
MZB 83-2768	Galeus polli	0.97	0.86	1	1.05118	0	0	1.07591	0	0	3.38951	Abrasive	6	0.408379	7	1	7.19979	Bioluminesc.	1	1.49949e-11	57.0464
MZB 83-2768	Galeus polli	0.43	0.97	0.75	1.30605	0.675749	0.9422	1.57984	1	0.506812	3.77384	Generalized	8	0.00774071	7	1	19.1465	Abrasive	7	3.96859e-11	67.0465
MZB 83-2768	Galeus polli	0.86	0.8	0.98	1.38776	0	0	1.25284	0	0	2.90196	Abrasive	6	0.988335	7	1	1.30387	Bioluminesc.	1	2.46486e-09	40.9461
MZB 83-2807	Etmopterus lucifer	0.63	0.38	1	2.17143	0	0	2.08981	0	0	2.09737	Bioluminesc.	3	0.0195034	7	0.999915	16.6907	Abrasive	6	8.4992e-05	35.4364
MZB 83-3022	Centroscyllium fabricii	0.5	0.26	0.96	3.12698	0	0	1.5766	0	0	2.26396	Bioluminesc.	3	0.995008	7	1	0.988741	Abrasive	6	1.39029e-11	50.9866
MZB 83-3037	Centrophorus squamosus	0.83	0.63	0.96	1.14308	0.656797	0.670775	1.36032	0.672948	0.0309556	3.11709	Abrasive	7	0.0770004	7	1	12.8052	Hydrodynamic	5	4.42853e-07	42.0652
MZB 83-3037	Centrophorus squamosus	0.77	0.81	0.93	1.53978	0.710922	1.20242	1.54509	1	0.472204	2.62525	Generalized	8	0.652717	7	0.942057	5.05938	Hydrodynamic	5	0.0570902	10.6662
MZB 83-3037	Centrophorus squamosus	0.87	0.61	1	1.57426	0	0	1.42476	0	0	2.53208	Abrasive	6	0.860854	7	1	3.25099	Bioluminesc.	1	1.27557e-08	39.6056
MZB 93-0302	Etmopterus pusillus	0.5	0.66	0.73	1.42246	0	0	2.24346	0	0	2.81579	Bioluminesc.	1	0.99527	7	1	0.971879	Abrasive	6	9.55368e-09	37.9046
ZMB-11524	Triakis semifasciata	0.92	0.82	0.98	1.13285	0	0	1.41667	0	0	2.91898	Abrasive	6	0.705999	7	1	4.62185	Bioluminesc.	1	2.55766e-08	39.585
ZMB-11524	Triakis semifasciata	0.26	0.84	0.48	1.20039	1	3.95342	3.29343	1	0	3.48609	Defensive	4	3.45795e-09	7	1	53.153	Generalized	8	0	280.325
ZMB-11524	Triakis semifasciata	0.82	0.73	0.96	1.33708	0	0	1.3829	0	0	2.87955	Abrasive	6	0.999722	7	1	0.406473	Bioluminesc.	1	8.9278e-08	32.8695
ZMB-12521	Brachaelurus waddi	0.94	0.98	0.98	0.985213	0	0	1.30506	0	0	3.22326	Abrasive	6	0.637549	7	1	5.18377	Bioluminesc.	1	2.66761e-09	44.6679
ZMB-15790	Carcharhinus limbatus	0.96	0.97	0.93	0.989218	0	0	0.725505	0	0	3.04905	Abrasive	6	0.0010886	7	1	24.1125	Bioluminesc.	1	3.94507e-11	72.0245
ZMB-15790	Carcharhinus limbatus	0.88	0.9	0.93	0.926437	0.645161	0.563916	1.46239	0.933002	0.598015	2.94541	Hydrodynamic	5	0.51298	7	0.984657	6.23162	Abrasive	7	0.00826637	15.7918
ZMB-15790	Carcharhinus limbatus	0.86	0.75	0.99	1.22819	0	0	1.56088	0	0	2.63661	Abrasive	6	0.927238	7	1	2.49812	Bioluminesc.	1	7.62234e-08	35.2773
ZMB-15793	Sphyrna tudes	0.95	0.99	0.97	0.993976	0	0	1.25252	0	0	3.26667	Abrasive	6	0.409526	7	1	7.18845	Bioluminesc.	1	3.64042e-09	46.0508
ZMB-15793	Sphyrna tudes	0.94	0.82	0.98	1.09816	0.670391	0.654962	1.32707	0.871508	0.446927	3.02793	Hydrodynamic	5	0.779228	7	0.897308	4.00477	Abrasive	7	0.102689	8.34016
ZMB-15793	Sphyrna tudes	0.86	0.65	0.97	1.28755	0.223333	0.0966	1.5042	0.316667	0.17	2.74667	Abrasive	6	0.000353373	7	0.985665	26.8587	Abrasive	7	0.0143342	35.32
ZMB-18741	Orectolobus japonicus	0.92	0.75	0.94	1.07951	0	0	1.57282	0	0	3.07038	Abrasive	6	0.105429	7	0.999983	11.855	Bioluminesc.	1	1.68512e-05	33.8372
ZMB-18741	Orectolobus japonicus	0.88	0.73	0.95	1.35542	0.357037	0.305728	1.76943	0.465185	0.14963	2.58222	Abrasive	7	0.0104877	7	1	18.3498	Hydrodynamic	5	4.11524e-09	56.9669
ZMB-18741	Orectolobus japonicus	0.92	0.77	0.99	1.25046	0	0	1.22396	0	0	2.92931	Abrasive	6	0.835553	7	1	3.49691	Bioluminesc.	1	6.16972e-10	45.9093
ZMB-18979	Squalus megalops	0.94	0.79	0.99	1.11367	0	0	1.47472	0	0	2.85917	Abrasive	6	0.446013	7	1	6.83731	Bioluminesc.	1	2.75726e-08	41.6502
ZMB-18979	Squalus megalops	0.49	0.67	0.73	1.4574	1	3.41795	2.34524	1	0	2.75385	Defensive	4	0.978905	7	1	1.59324	Generalized	8	0	129.897
ZMB-18979	Squalus megalops	0.84	0.64	0.98	1.18824	0	0	1.35397	0	0	3.05743	Abrasive	6	0.9999	7	1	0.299794	Bioluminesc.	1	4.63698e-09	38.6782
ZMB-20236	Chiloscyllium indicum	0.9	0.78	0.98	1.17824	0	0	1.18325	0	0	3.16879	Abrasive	6	0.907959	7	1	2.7401	Bioluminesc.	1	5.15198e-10	45.513
ZMB-20236	Chiloscyllium indicum	0.84	0.77	0.97	1.4181	0.381459	0.32909	1.59482	0.471125	0.135258	2.56839	Abrasive	7	0.0545766	7	1	13.8147	Generalized	8	7.30965e-10	55.888
ZMB-20236	Chiloscyllium indicum	0.91	0.79	0.98	1.327	0	0	1.22084	0	0	2.92693	Abrasive	6	0.81179	7	1	3.71651	Bioluminesc.	1	2.04027e-09	43.7369
ZMB-21723	Squalus cubensis	0.9	0.76	0.98	1.32347	0	0	1.01281	0	0	3.22684	Abrasive	6	0.645882	7	1	5.11541	Bioluminesc.	1	5.6838e-11	52.297
ZMB-21723	Squalus cubensis	0.4	0.7	0.69	1.42169	1	3.27971	2.30691	1	0	3.11229	Defensive	4	0.933998	7	1	2.40613	Generalized	8	0	118.062
ZMB-21723	Squalus cubensis	0.87	0.72	0.98	1.21823	0	0	1.32777	0	0	2.98186	Abrasive	6	0.995337	7	1	0.967435	Bioluminesc.	1	4.79528e-09	39.2787
ZMB-31555	Apristurus parvipinnis	0.91	0.86	0.98	0.892562	0	0	0.882317	0	0	3.86111	Abrasive	6	0.188967	7	1	9.99306	Bioluminesc.	1	1.14534e-12	64.9837
ZMB-31555	Apristurus parvipinnis	0.53	0.7	0.79	1.5348	0.706444	1.32414	1.72874	1	0.46778	2.97852	Generalized	8	0.644116	7	1	5.12989	Abrasive	7	7.37589e-09	42.58
ZMB-31555	Apristurus parvipinnis	0.87	0.79	0.97	1.48988	0	0	1.45355	0	0	2.58152	Abrasive	6	0.788256	7	1	3.92604	Bioluminesc.	1	3.48831e-07	33.6634
ZMB-31556	Apristurus canutus	0.94	0.79	0.98	0.900312	0	0	1.36283	0	0	3.3045	Abrasive	6	0.623973	7	1	5.29532	Bioluminesc.	1	4.83035e-09	43.592
ZMB-31556	Apristurus canutus	0.4	0.79	0.69	1.39535	0.619444	1.10578	2.06529	0.952778	0.508333	3.30278	Generalized	8	0.000709296	7	1	25.1652	Abrasive	7	2.7679e-12	78.391
ZMB-31556	Apristurus canutus	0.78	0.56	0.98	1.70745	0	0	1.48461	0	0	2.52025	Abrasive	6	0.871965	7	0.99998	3.13784	Bioluminesc.	3	1.98589e-05	24.7915
ZMB-31642	Galeocerdo cuvier	0.96	0.95	0.99	0.89931	0	0	1.18691	0	0	3.50767	Abrasive	6	0.510372	7	1	6.25446	Bioluminesc.	1	1.15945e-10	52.0103
ZMB-31642	Galeocerdo cuvier	0.92	0.79	0.99	0.83224	0.697072	0.59271	1.46568	0.95045	0.538288	3.33784	Hydrodynamic	5	0.982774	7	0.997273	1.48649	Abrasive	7	0.00271662	13.2978
ZMB-31642	Galeocerdo cuvier	0.86	0.62	0.98	1.86093	0	0	1.58081	0	0	2.23132	Abrasive	6	0.192646	7	0.999995	9.92877	Bioluminesc.	1	4.51992e-06	34.5428
ZMB-33797	Carcharhinus porosus	0.95	0.91	0.99	0.97861	0	0	1.20339	0	0	3.35519	Abrasive	6	0.621226	7	1	5.31793	Bioluminesc.	1	1.91387e-10	50.0714
ZMB-33797	Carcharhinus porosus	0.89	0.98	0.98	0.967901	0.65051	0.568753	1.38862	0.984694	0.714286	3.23469	Hydrodynamic	5	0.263751	7	0.967478	8.84805	Generalized	8	0.0308032	15.7422
ZMB-33797	Carcharhinus porosus	0.86	0.65	0.98	1.464	0	0	1.4159	0	0	2.65027	Abrasive	6	0.951996	7	1	2.13494	Bioluminesc.	1	5.31675e-08	35.6346
ZMB-33860	Etmopterus baxteri	0.64	0.38	0.96	2.58852	0	0	1.25586	0	0	2.46211	Bioluminesc.	3	0.518723	7	0.999258	6.18151	Abrasive	6	0.00074235	20.5914
ZMB-34840	Sphyrna zygaena	0.96	0.94	0.97	0.977157	0	0	1.17802	0	0	3.13247	Abrasive	6	0.29853	7	1	8.40143	Bioluminesc.	1	1.1015e-09	49.6546
ZMB-34840	Sphyrna zygaena	0.88	0.86	0.96	0.967901	0.622449	0.537382	1.43299	0.997449	0.714286	3.22704	Hydrodynamic	5	0.0336625	7	0.638894	15.1881	Generalized	8	0.360765	16.3311
ZMB-34840	Sphyrna zygaena	0.82	0.78	0.95	1.33942	0	0	1.48834	0	0	2.73025	Abrasive	6	0.990106	7	0.999999	1.2347	Bioluminesc.	1	1.45636e-06	28.1138
ZMB-4541	Alopias vulpinus	0.98	0.92	0.99	0.968992	0	0	1.16504	0	0	3.19467	Abrasive	6	0.290453	7	1	8.50149	Bioluminesc.	1	1.36451e-10	53.9316
ZMB-4541	Alopias vulpinus	0.87	0.91	0.98	0.967901	0.757653	0.802805	1.4449	0.997449	0.655612	3.31633	Hydrodynamic	5	0.959089	7	0.997809	2.01351	Abrasive	7	0.00212163	14.3203
ZMB-4541	Alopias vulpinus	0.85	0.7	0.97	1.34601	0	0	1.42484	0	0	2.72599	Abrasive	6	0.989197	7	1	1.27109	Bioluminesc.	1	9.30884e-08	33.6505
ZMB-6566	Poroderma pantherinum	0.89	0.92	0.97	0.868476	0	0	1.43624	0	0	3.35817	Abrasive	6	0.946836	7	1	2.21738	Bioluminesc.	1	2.27099e-08	37.4183
ZMB-6566	Poroderma pantherinum	0.84	0.87	0.95	0.987915	0	0	1.5617	0	0	3.11774	Abrasive	6	0.981663	7	0.999999	1.51849	Bioluminesc.	1	1.36199e-06	28.5316
ZMB-6566	Poroderma pantherinum	0.89	0.82	0.98	1.08557	0	0	1.45343	0	0	2.98918	Abrasive	6	0.941728	7	1	2.29498	Bioluminesc.	1	2.73609e-08	37.1233
ZMB-7147	Schroederichthys bivius	0.84	0.69	0.97	1.29464	0	0	1.24101	0	0	3.04414	Abrasive	6	0.995563	7	1	0.952234	Bioluminesc.	1	3.15482e-09	40.1009
ZMB-7147	Schroederichthys bivius	0.55	0.6	0.81	1.60097	0.592705	1.03245	1.83572	1	0.667173	2.80243	Generalized	8	0.0502885	7	1	14.0506	Abrasive	7	6.73938e-12	65.4967
ZMB-7147	Schroederichthys bivius	0.91	0.9	0.98	1.06789	0	0	1.25273	0	0	3.2079	Abrasive	6	0.900801	7	1	2.8239	Bioluminesc.	1	1.13722e-09	44.0133
ZMB-7147	Schroederichthys bivius	0.85	0.69	0.97	1.2699	0	0	1.67598	0	0	2.62997	Abrasive	6	0.682563	7	0.999996	4.81471	Bioluminesc.	1	4.3336e-06	29.5129
ZMB-9218	Triaenodon obesus	0.97	0.98	0.91	0.982097	0	0	1.25073	0	0	2.86198	Abrasive	6	0.00211292	7	0.999998	22.4631	Bioluminesc.	1	2.05973e-06	48.6489
ZMB-9218	Triaenodon obesus	0.86	0.89	0.95	0.975669	0.633416	0.568709	1.45281	0.970075	0.690773	3.21446	Hydrodynamic	5	0.138423	7	0.680141	11.0045	Generalized	8	0.316438	12.5349
ZMB-9218	Triaenodon obesus	0.87	0.72	0.96	1.3125	0	0	1.43722	0	0	2.67227	Abrasive	6	0.888238	7	1	2.96481	Bioluminesc.	1	3.4837e-07	32.7048
