# Supplementary material for: Squamation and ecology of thelodonts
Source: PLoS One. 2017 Feb 27;12(2):e0172781. doi: 10.1371/journal.pone.0172781 (PMC5328365; doi:10.1371/journal.pone.0172781)
Supplement: S11 Table — (A) Summary statistics. Eigenvalues, proportions of explained variance, canonical correlations and standardized coefficients are shown for each discriminant function. (B) Wilks' lambda test of functions. (C) Pairwise group comparisons. (D) Summary results of the original and cross-validated classification for all studied sharks. (E) Detailed results of the original and cross-validated classification for all sharks. The assignment probabilities for the highest and the second highest predicted ecological group are given for each specimen. (XLSX) [file pone.0172781.s011.xlsx]

## Sheet: S11A Table
S11A Table. Results of Canonical Variate Analysis-2.3 (CVA-2.3, with six ecological groups as defined groups and scale morphotype percentages of coverage on the ventral side of the body as discriminant variables). Summary statistics. Eigenvalues, proportions of explained variance, canonical correlations and standardized coefficients are shown for each discriminant function.
	Function 1	Function 2	Function 3	Function 4	Function 5
Eigenvalue	513188	174095	33667	17680	0
% of variance	69.4783	23.5699	4.55808	2.39367	1.83394e-05
Cumulative %	69.4783	93.0482	97.6063	100	100
Canonical correlation	0.999027	0.99714	0.985472	0.972866	0.0116379
Standardized coefficients
Morphotype 4	0.983346	0.262488	0.180098	0.036877	0.000622277
Morphotype 5	-0.205198	1.07054	0.403397	0.0685161	0.00057361
Morphotype 6	0.121222	0.77778	2.94874	1.8135	-0.229794
Morphotype 7	0.117583	0.700058	2.98344	1.66222	0.787945
Morphotype 8	0.0566502	0.062714	1.38181	-0.336624	0.00268619

## Sheet: S11B Table
S11B Table. Results of Canonical Variate Analysis-2.3 (CVA-2.3, with six ecological groups as defined groups and scale morphotype percentages of coverage on the ventral side of the body as discriminant variables). Wilks' lambda test of functions.
Test of functions	Wilks' Lambda	Chi-square	df	Sig.
1 to 5	1.7149e-08	885.126	25	1.26279e-170
2 to 5	8.81783e-06	576.117	16	2.64412e-112
3 to 5	0.00154395	320.434	9	1.1997e-63
4 to 5	0.0535249	144.917	4	2.49916e-30
5	0.999865	0.00670482	1	0.93474

## Sheet: S11C Table
S11C Table. Results of Canonical Variate Analysis-2.3 (CVA-2.3, with six ecological groups as defined groups and scale morphotype percentages of coverage on the ventral side of the body as discriminant variables). Pairwise group comparisons.
Steep	Ecological group		Strong-swimming	Schooling	Hard substrate	Soft substrate	Bioluminescent	Open water
1	Strong-swimming	F		19224.6	0	0	0	0
		Sig.		2.51437e-66	1	1	1	1
	Schooling	F	19224.6		14418.5	14418.5	14418.5	14418.5
		Sig.	2.51437e-66		3.27111e-63	3.27111e-63	3.27111e-63	3.27111e-63
	Hard substrate	F	0	14418.5		0	0	0
		Sig.	1	3.27111e-63		1	1	1
	Soft substrate	F	0	14418.5	0		0	0
		Sig.	1	3.27111e-63	1		1	1
	Bioluminescent	F	0	14418.5	0	0		0
		Sig.	1	3.27111e-63	1	1		1
	Open water	F	0	14418.5	0	0	0
		Sig.	1	3.27111e-63	1	1	1
2	Strong-swimming	F		11492.3	2072.22	2072.22	2072.22	2072.22
		Sig.		3.40375e-66	4.53784e-48	4.53784e-48	4.53784e-48	4.53784e-48
	Schooling	F	11492.3		7065.05	7065.05	7065.05	7065.05
		Sig.	3.40375e-66		4.94782e-61	4.94782e-61	4.94782e-61	4.94782e-61
	Hard substrate	F	2072.22	7065.05		0	0	0
		Sig.	4.53784e-48	4.94782e-61		1	1	1
	Soft substrate	F	2072.22	7065.05	0		0	0
		Sig.	4.53784e-48	4.94782e-61	1		1	1
	Bioluminescent	F	2072.22	7065.05	0	0		0
		Sig.	4.53784e-48	4.94782e-61	1	1		1
	Open water	F	2072.22	7065.05	0	0	0
		Sig.	4.53784e-48	4.94782e-61	1	1	1
3	Strong-swimming	F		7523.52	1353.28	1357.13	1353.29	1686.26
		Sig.		3.90336e-64	2.34336e-46	2.19074e-46	2.34316e-46	1.26339e-48
	Schooling	F	7523.52		4627.68	4617.96	4627.23	4760.13
		Sig.	3.90336e-64		4.3926e-59	4.61919e-59	4.40274e-59	2.2367e-59
	Hard substrate	F	1353.28	4627.68		2.88658	0.00367281	249.733
		Sig.	2.34336e-46	4.3926e-59		0.0451417	0.999689	2.80877e-29
	Soft substrate	F	1357.13	4617.96	2.88658		2.68432	198.921
		Sig.	2.19074e-46	4.61919e-59	0.0451417		0.0570343	4.54282e-27
	Bioluminescent	F	1353.29	4627.23	0.00367281	2.68432		247.821
		Sig.	2.34316e-46	4.40274e-59	0.999689	0.0570343		3.33947e-29
	Open water	F	1686.26	4760.13	249.733	198.921	247.821
		Sig.	1.26339e-48	2.2367e-59	2.80877e-29	4.54282e-27	3.33947e-29
4	Strong-swimming	F		5526.04	995.225	999.51	1023.26	1255.71
		Sig.		3.67922e-62	9.10395e-45	8.23981e-45	4.77646e-45	4.09463e-47
	Schooling	F	5526.04		3398.48	3391.69	3412.96	3503.34
		Sig.	3.67922e-62		3.25979e-57	3.41608e-57	2.95104e-57	1.60009e-57
	Hard substrate	F	995.225	3398.48		2.31225	13.483	190.061
		Sig.	9.10395e-45	3.25979e-57		0.0713845	2.14684e-07	2.20747e-28
	Soft substrate	F	999.51	3391.69	2.31225		12.4229	150.674
		Sig.	8.23981e-45	3.41608e-57	0.0713845		5.67778e-07	3.57721e-26
	Bioluminescent	F	1023.26	3412.96	13.483	12.4229		183.182
		Sig.	4.77646e-45	2.95104e-57	2.14684e-07	5.67778e-07		4.97657e-28
	Open water	F	1255.71	3503.34	190.061	150.674	183.182
		Sig.	4.09463e-47	1.60009e-57	2.20747e-28	3.57721e-26	4.97657e-28
5	Strong-swimming	F		4326.93	779.439	783.051	1056.79	985.972
		Sig.		2.92291e-60	3.05469e-43	2.75014e-43	2.99755e-46	1.45558e-45
	Schooling	F	4326.93		2661.47	2655.68	2854.67	2744.26
		Sig.	2.92291e-60		2.02338e-55	2.12683e-55	4.06046e-56	1.00275e-55
	Hard substrate	F	779.439	2661.47		2.75499	213.112	152.162
		Sig.	3.05469e-43	2.02338e-55		0.0293596	1.30008e-30	2.01577e-27
	Soft substrate	F	783.051	2655.68	2.75499		185.563	118.711
		Sig.	2.75014e-43	2.12683e-55	0.0293596		2.70189e-29	4.12198e-25
	Bioluminescent	F	1056.79	2854.67	213.112	185.563		297.244
		Sig.	2.99755e-46	4.06046e-56	1.30008e-30	2.70189e-29		8.22984e-34
	Open water	F	985.972	2744.26	152.162	118.711	297.244
		Sig.	1.45558e-45	1.00275e-55	2.01577e-27	4.12198e-25	8.22984e-34

## Sheet: S11D Table
S11D Table. Results of Canonical Variate Analysis-2.3 (CVA-2.3, with six ecological groups as defined groups and scale morphotype percentages of coverage on the ventral side of the body as discriminant variables). Summary results of the original and cross-validated classification for all studied sharks.
Ecological group	Predicted ecological group						Classified correctly		Misclassified
	Near-shore	Schooling	Hard substrate	Soft substrate	Bioluminescent	Open water	Count	%	Count	%
Original cases
Strong-swimming	16	0	0	0	0	0	16	100	0	0
Schooling	0	8	0	0	0	0	8	100	0	0
Hard substrate	0	0	8	0	0	0	8	100	0	0
Soft substrate	0	0	4	4	0	0	4	50	4	50
Bioluminescent	0	0	0	0	8	0	8	100	0	0
Open water	0	0	0	0	0	8	8	100	0	0
Cross-validated cases
Strong-swimming	16	0	0	0	0	0	16	100	0	0
Schooling	0	8	0	0	0	0	8	100	0	0
Hard substrate	0	0	7	1	0	0	7	87.5	1	12.5
Soft substrate	0	0	6	2	0	0	2	25	6	75
Bioluminescent	0	0	0	0	8	0	8	100	0	0
Open water	0	0	0	0	0	8	8	100	0	0
92.9% of original grouped cases correctly classified.
87.5% of cross-validated grouped cases correctly classified.

## Sheet: S11E Table
S11E Table. Results of Canonical Variate Analysis-2.3 (CVA-2.3, with six ecological groups as defined groups and scale morphotype percentages of coverage on the ventral side of the body as discriminant variables). Detailed results of the original and cross-validated classification for all sharks. The assignation probabilities for the highest and the second highest predicted ecological group are g…
Original cases	Species	Ecological group	HIGHEST GROUP					SECOND HIGHEST GROUP
			Predicted ecological group	Conditional probability [P(D>d | G=g)]		Posterior probability [P(G=g | D=d)]	Squared Mahalanobis distance to centroid	Predicted ecological group	Posterior probability [P(G=g | D=d)]	Squared Mahalanobis distance to centroid
Registration number				p	df
MOVI-24648	Carcharhinus brachyurus	Strong-swimming	Strong-swimming	0.0278265	5	1	12.5639	Hard substrate	0	607.205
MOVI-24633	Carcharhinus brevipinna	Strong-swimming	Strong-swimming	0.98747	5	1	0.611519	Hard substrate	0	838.918
ZMB-15790	Carcharhinus limbatus	Strong-swimming	Strong-swimming	0.954789	5	1	1.09223	Hard substrate	0	854.216
MCTA-00495	Carcharhinus melanopterus	Strong-swimming	Strong-swimming	0.999701	5	1	0.128243	Hard substrate	0	774.226
ZMB-33797	Carcharhinus porosus	Strong-swimming	Strong-swimming	0.969007	5	1	0.91661	Hard substrate	0	849.101
MCTA-00510	Carcharhinus sorrah	Strong-swimming	Strong-swimming	0.964679	5	1	0.973441	Hard substrate	0	850.804
ZMB-31642	Galeocerdo cuvier	Strong-swimming	Strong-swimming	0.982617	5	1	0.706379	Hard substrate	0	842.305
ZMB-9218	Triaenodon obesus	Strong-swimming	Strong-swimming	0.00397661	5	1	17.2929	Hard substrate	0	577.36
ZMB-4541	Alopias vulpinus	Strong-swimming	Strong-swimming	0.949196	5	1	1.15419	Hard substrate	0	855.924
MCTA-00508	Isurus oxyrinchus	Strong-swimming	Strong-swimming	0.959945	5	1	1.03198	Hard substrate	0	852.509
MCTA-00507	Prionace glauca	Strong-swimming	Strong-swimming	0.104737	5	1	9.1105	Hard substrate	0	633.387
MCTA-00516	Sphyrna tiburo	Strong-swimming	Strong-swimming	0.999984	5	1	0.0389376	Hard substrate	0	805.418
MCTA-00512	Sphyrna tiburo	Strong-swimming	Strong-swimming	0.949196	5	1	1.15419	Hard substrate	0	855.924
ZMB-15793	Sphyrna tudes	Strong-swimming	Strong-swimming	0.949196	5	1	1.15419	Hard substrate	0	855.924
MCTA-00090	Sphyrna zygaena	Strong-swimming	Strong-swimming	0.949196	5	1	1.15419	Hard substrate	0	855.924
ZMB-34840	Sphyrna zygaena	Strong-swimming	Strong-swimming	0.969007	5	1	0.91661	Hard substrate	0	849.101
MCTA-00434	Deania calcea	Schooling	Schooling	0.997604	5	1	0.302058	Soft substrate	0	3621.59
MCTA-00505	Galeorhinus galeus	Schooling	Schooling	0.5018	5	1	4.33834	Soft substrate	0	3409.31
MCTA-00509	Pristiophorus cirratus	Schooling	Schooling	0.993804	5	1	0.451118	Soft substrate	0	3682.12
MCTA-00506	Squalus acanthias	Schooling	Schooling	0.794278	5	1	2.38115	Soft substrate	0	3793.48
MZB 050881	Squalus blainville	Schooling	Schooling	0.99945	5	1	0.164428	Soft substrate	0	3642.75
ZMB-21723	Squalus cubensis	Schooling	Schooling	0.000318964	5	1	23.1287	Soft substrate	0	3056.01
ZMB-18979	Squalus megalops	Schooling	Schooling	0.992521	5	1	0.488999	Soft substrate	0	3533.64
ZMB-11524	Triakis semifasciata	Schooling	Schooling	0.000806256	5	1	21.0108	Soft substrate	0	4179.5
MCTA-00424	Atelomycterus marmoratus	Hard substrate	Hard substrate	0.00827769	5	0.878512	15.5429	Soft substrate	0.121488	19.4998
ZMB-12521	Brachaelurus waddi	Hard substrate	Hard substrate	0.932261	5	0.862996	1.32574	Soft substrate	0.137004	5.00654
ZMB-20236	Chiloscyllium indicum	Hard substrate	Hard substrate	0.932261	5	0.862996	1.32574	Soft substrate	0.137004	5.00654
MCTA-00471	Chiloscyllium punctatum	Hard substrate	Hard substrate	0.932261	5	0.862996	1.32574	Soft substrate	0.137004	5.00654
MCTA-00513	Chiloscyllium punctatum	Hard substrate	Hard substrate	0.932261	5	0.862996	1.32574	Soft substrate	0.137004	5.00654
MCTA-00487	Ginglymostoma cirratum	Hard substrate	Hard substrate	0.465436	5	0.873223	4.60898	Soft substrate	0.126777	8.4685
ZMB-18741	Orectolobus japonicus	Hard substrate	Hard substrate	0.999793	5	0.865599	0.110402	Soft substrate	0.134401	3.83559
ZMB-6566	Poroderma pantherinum	Hard substrate	Hard substrate	0.932261	5	0.862996	1.32574	Soft substrate	0.137004	5.00654
MCTA-00098	Mustelus asterias	Soft substrate	Hard substrate	0.932261	5	0.862996	1.32574	Soft substrate	0.137004	5.00654
-	Mustelus mustelus	Soft substrate	Hard substrate	0.932261	5	0.862996	1.32574	Soft substrate	0.137004	5.00654
MOVI-24680	Mustelus schmitti	Soft substrate	Hard substrate	0.00314472	5	0.879325	17.8468	Soft substrate	0.120675	21.8189
ZMB-7147	Schroederichthys bivius	Soft substrate	Soft substrate	0.866967	5	0.546542	1.86893	Hard substrate	0.453458	2.24235
-	Scyliorhinus canicula	Soft substrate	Soft substrate	0.000519576	5	0.999882	22.0176	Hard substrate	0.000117518	40.1152
MCTA-00502	Scyliorhinus haeckelii	Soft substrate	Soft substrate	0.0769522	5	0.998203	9.94004	Hard substrate	0.0017967	22.58
MCTA-00093	Scyliorhinus stellaris	Soft substrate	Hard substrate	0.933566	5	0.856734	1.31322	Soft substrate	0.143266	4.89006
MCTA-00092	Squatina aculeata	Soft substrate	Soft substrate	4.33702e-07	5	0.998965	37.6988	Hard substrate	0.0010348	51.4439
MZB 83-3022	Centroscyllium fabricii	Bioluminescent	Bioluminescent	0.996792	5	1	0.341352	Soft substrate	0	271.004
MCTA-00511	Dalatias licha	Bioluminescent	Bioluminescent	0.999343	5	1	0.176836	Soft substrate	0	247.288
ZMB-33860	Etmopterus baxteri	Bioluminescent	Bioluminescent	0.996792	5	1	0.341352	Soft substrate	0	271.004
MCTA-00459	Etmopterus bigelowi	Bioluminescent	Bioluminescent	0.996792	5	1	0.341352	Soft substrate	0	271.004
MZB 83-2807	Etmopterus lucifer	Bioluminescent	Bioluminescent	0.996792	5	1	0.341352	Soft substrate	0	271.004
MZB 93-0302	Etmopterus pusillus	Bioluminescent	Bioluminescent	0.996792	5	1	0.341352	Soft substrate	0	271.004
MCTA-00230	Etmopterus spinax	Bioluminescent	Bioluminescent	0.998894	5	1	0.219157	Soft substrate	0	237.905
MCTA-00477	Isistius brasiliensis	Bioluminescent	Bioluminescent	0.365541	5	1	5.43127	Soft substrate	0	184.31
ZMB-31556	Apristurus canutus	Open water	Open water	1	5	1	0.000713838	Soft substrate	0	161.97
MZB 83-2739	Apristurus nasutus	Open water	Open water	1	5	1	0.00177251	Soft substrate	0	162.36
ZMB-31555	Apristurus parvipinnis	Open water	Open water	0.99774	5	1	0.294798	Soft substrate	0	147.856
MZB 83-3037	Centrophorus squamosus	Open water	Open water	0.984961	5	1	0.662552	Soft substrate	0	182.526
MCTA-00519	Galeus melastomus	Open water	Open water	0.982412	5	1	0.71006	Soft substrate	0	183.316
MZB 83-2768	Galeus polli	Open water	Open water	0.779668	5	1	2.47891	Soft substrate	0	123.951
MOVI-24582	Heptranchias perlo	Open water	Open water	0.982412	5	1	0.71006	Soft substrate	0	183.316
MCTA-00518	Hexanchus griseus	Open water	Open water	0.999081	5	1	0.203022	Soft substrate	0	150.101
Cross-validated cases	Species	Ecological group	HIGHEST GROUP					SECOND HIGHEST GROUP
			Predicted ecological group	Conditional probability [P(D>d | G=g)]		Posterior probability [P(G=g | D=d)]	Squared Mahalanobis distance to centroid	Predicted ecological group	Posterior probability [P(G=g | D=d)]	Squared Mahalanobis distance to centroid
Registration number				p	df
MOVI-24648	Carcharhinus brachyurus	Strong-swimming	Strong-swimming	0.00352677	5	1	17.5765	Hard substrate	6.17271e-159	746.158
MOVI-24633	Carcharhinus brevipinna	Strong-swimming	Strong-swimming	0.986371	5	1	0.634472	Hard substrate	1.05253e-166	764.99
ZMB-15790	Carcharhinus limbatus	Strong-swimming	Strong-swimming	0.950032	5	1	1.14513	Hard substrate	2.14076e-171	787.107
MCTA-00495	Carcharhinus melanopterus	Strong-swimming	Strong-swimming	0.999681	5	1	0.131681	Hard substrate	2.02004e-152	698.711
ZMB-33797	Carcharhinus porosus	Strong-swimming	Strong-swimming	0.965934	5	1	0.957329	Hard substrate	9.1507e-170	779.409
MCTA-00510	Carcharhinus sorrah	Strong-swimming	Strong-swimming	0.961106	5	1	1.01794	Hard substrate	2.66361e-170	781.938
ZMB-31642	Galeocerdo cuvier	Strong-swimming	Strong-swimming	0.981028	5	1	0.734399	Hard substrate	1.07392e-167	769.655
ZMB-9218	Triaenodon obesus	Strong-swimming	Strong-swimming	3.54385e-05	5	1	28.0594	Hard substrate	2.81512e-173	822.684
ZMB-4541	Alopias vulpinus	Strong-swimming	Strong-swimming	0.943748	5	1	1.21173	Hard substrate	5.90838e-172	789.748
MCTA-00508	Isurus oxyrinchus	Strong-swimming	Strong-swimming	0.955812	5	1	1.08054	Hard substrate	7.61854e-171	784.503
MCTA-00507	Prionace glauca	Strong-swimming	Strong-swimming	0.0410224	5	1	11.5798	Hard substrate	8.51625e-152	707.282
MCTA-00516	Sphyrna tiburo	Strong-swimming	Strong-swimming	0.999983	5	1	0.0399053	Hard substrate	2.97331e-158	725.477
MCTA-00512	Sphyrna tiburo	Strong-swimming	Strong-swimming	0.943748	5	1	1.21173	Hard substrate	5.90838e-172	789.748
ZMB-15793	Sphyrna tudes	Strong-swimming	Strong-swimming	0.943748	5	1	1.21173	Hard substrate	5.90838e-172	789.748
MCTA-00090	Sphyrna zygaena	Strong-swimming	Strong-swimming	0.943748	5	1	1.21173	Hard substrate	5.90838e-172	789.748
ZMB-34840	Sphyrna zygaena	Strong-swimming	Strong-swimming	0.965934	5	1	0.957329	Hard substrate	9.1507e-170	779.409
MCTA-00434	Deania calcea	Schooling	Schooling	0.996419	5	1	0.357541	Soft substrate	0	3260.39
MCTA-00505	Galeorhinus galeus	Schooling	Schooling	0.340601	5	1	5.66113	Soft substrate	0	3284.62
MCTA-00509	Pristiophorus cirratus	Schooling	Schooling	0.990753	5	1	0.535819	Soft substrate	0	3342.6
MCTA-00506	Squalus acanthias	Schooling	Schooling	0.706125	5	1	2.96018	Soft substrate	0	3605.55
MZB 050881	Squalus blainville	Schooling	Schooling	0.999177	5	1	0.194016	Soft substrate	0	3284.67
ZMB-21723	Squalus cubensis	Schooling	Schooling	3.65823e-11	5	1	57.682	Open water	0	5769.57
ZMB-18979	Squalus megalops	Schooling	Schooling	0.988842	5	1	0.581321	Soft substrate	0	3208.86
ZMB-11524	Triakis semifasciata	Schooling	Schooling	4.45144e-09	5	1	47.5196	Soft substrate	0	7232.15
MCTA-00424	Atelomycterus marmoratus	Hard substrate	Soft substrate	0.000118485	5	0.81566	25.3643	Hard substrate	0.18434	28.3387
ZMB-12521	Brachaelurus waddi	Hard substrate	Hard substrate	0.900387	5	0.812625	1.60712	Soft substrate	0.187375	4.54144
ZMB-20236	Chiloscyllium indicum	Hard substrate	Hard substrate	0.900387	5	0.812625	1.60712	Soft substrate	0.187375	4.54144
MCTA-00471	Chiloscyllium punctatum	Hard substrate	Hard substrate	0.900387	5	0.812625	1.60712	Soft substrate	0.187375	4.54144
MCTA-00513	Chiloscyllium punctatum	Hard substrate	Hard substrate	0.900387	5	0.812625	1.60712	Soft substrate	0.187375	4.54144
MCTA-00487	Ginglymostoma cirratum	Hard substrate	Hard substrate	0.300819	5	0.737558	6.05588	Soft substrate	0.262442	8.12251
ZMB-18741	Orectolobus japonicus	Hard substrate	Hard substrate	0.99969	5	0.840381	0.130107	Soft substrate	0.159619	3.45224
ZMB-6566	Poroderma pantherinum	Hard substrate	Hard substrate	0.900387	5	0.812625	1.60712	Soft substrate	0.187375	4.54144
MCTA-00098	Mustelus asterias	Soft substrate	Hard substrate	0.941761	5	0.937428	1.2321	Soft substrate	0.0625719	6.64574
-	Mustelus mustelus	Soft substrate	Hard substrate	0.941761	5	0.937428	1.2321	Soft substrate	0.0625719	6.64574
MOVI-24680	Mustelus schmitti	Soft substrate	Hard substrate	2.02383e-05	5	0.999982	29.301	Soft substrate	1.78741e-05	51.1653
ZMB-7147	Schroederichthys bivius	Soft substrate	Hard substrate	0.846532	5	0.534463	2.01884	Soft substrate	0.465537	2.29498
-	Scyliorhinus canicula	Soft substrate	Soft substrate	5.13728e-10	5	0.999936	52.1036	Hard substrate	6.44896e-05	71.4014
MCTA-00502	Scyliorhinus haeckelii	Soft substrate	Soft substrate	0.0098623	5	0.995305	15.1199	Hard substrate	0.00469494	25.833
MCTA-00093	Scyliorhinus stellaris	Soft substrate	Hard substrate	0.943242	5	0.932602	1.21694	Soft substrate	0.0673977	6.47167
MCTA-00092	Squatina aculeata	Soft substrate	Hard substrate	1.74585e-66	5	0.81179	317.478	Soft substrate	0.18821	320.401
MZB 83-3022	Centroscyllium fabricii	Bioluminescent	Bioluminescent	0.995207	5	1	0.404418	Soft substrate	5.11612e-54	245.819
MCTA-00511	Dalatias licha	Bioluminescent	Bioluminescent	0.999017	5	1	0.208717	Soft substrate	4.93082e-49	222.671
ZMB-33860	Etmopterus baxteri	Bioluminescent	Bioluminescent	0.995207	5	1	0.404418	Soft substrate	5.11612e-54	245.819
MCTA-00459	Etmopterus bigelowi	Bioluminescent	Bioluminescent	0.995207	5	1	0.404418	Soft substrate	5.11612e-54	245.819
MZB 83-2807	Etmopterus lucifer	Bioluminescent	Bioluminescent	0.995207	5	1	0.404418	Soft substrate	5.11612e-54	245.819
MZB 93-0302	Etmopterus pusillus	Bioluminescent	Bioluminescent	0.995207	5	1	0.404418	Soft substrate	5.11612e-54	245.819
MCTA-00230	Etmopterus spinax	Bioluminescent	Bioluminescent	0.998345	5	1	0.258918	Soft substrate	2.19689e-47	215.128
MCTA-00477	Isistius brasiliensis	Bioluminescent	Bioluminescent	0.199988	5	1	7.28945	Soft substrate	3.98856e-40	188.729
ZMB-31556	Apristurus canutus	Open water	Open water	1	5	1	0.000839137	Soft substrate	2.21595e-32	145.775
MZB 83-2739	Apristurus nasutus	Open water	Open water	1	5	1	0.00208369	Soft substrate	1.85678e-32	146.13
ZMB-31555	Apristurus parvipinnis	Open water	Open water	0.996621	5	1	0.348889	Soft substrate	9.67585e-30	133.965
MZB 83-3037	Centrophorus squamosus	Open water	Open water	0.977616	5	1	0.790813	Soft substrate	9.04888e-37	166.777
MCTA-00519	Galeus melastomus	Open water	Open water	0.97384	5	1	0.848453	Soft substrate	5.90919e-37	167.687
MZB 83-2768	Galeus polli	Open water	Open water	0.686266	5	1	3.08901	Soft substrate	1.01833e-25	118.182
MOVI-24582	Heptranchias perlo	Open water	Open water	0.97384	5	1	0.848453	Soft substrate	5.90919e-37	167.687
MCTA-00518	Hexanchus griseus	Open water	Open water	0.998625	5	1	0.239767	Soft substrate	3.81966e-30	135.715
