# Supplementary material for: Squamation and ecology of thelodonts
Source: PLoS One. 2017 Feb 27;12(2):e0172781. doi: 10.1371/journal.pone.0172781 (PMC5328365; doi:10.1371/journal.pone.0172781)
Supplement: S15 Table — (XLSX) [file pone.0172781.s015.xlsx]

## Sheet: S15 Table
S15 Table. Numerical values for discriminant variables measured on thelodont scales coming from disarticulated remains and detailed results of the classification after their inclusion in Canonical Variate Analysis-1 (CVA-1, with eight scale morphotypes as defined groups and ten size-free variables of the crown surface as discriminant variables).
Order	Family	Species	Source	Scale series	Discriminant variables										HIGHEST GROUP						SECOND HIGHEST GROUP
															Predicted functional type	Predicted morphotype	Conditional probability [P(D>d | G=g)]		Posterior probability [P(G=g | D=d)]	Squared Mahalanobis distance to centroid	Predicted functional type	Predicted morphotype	Posterior probability [P(G=g | D=d)]	Squared Mahalanobis distance to centroid
					Circularity	Roundness	Solidity	MLC/MWC	RLA/MLC	RLA2/ACS	(MLC*MWC)/ACS	LLR/MLC	(LLR-LSR)/MLC	CP/MLC			p	df
Sandiviiformes	Sandiviidae	Sandivia melinkovi	[14]	head	0.93	0.73	1	1.43702	0	0	1.32671	0	0	2.66799	Abrasive	6	0.605116	7	1	5.45088	Bioluminescent	1	3.01945e-09	44.6873
Sandiviiformes	Sandiviidae	Sandivia melinkovi	[14]	transitional	0.82	0.51	1	1.87174	0	0	1.28731	0	0	2.52497	Abrasive	6	0.786628	7	0.999991	3.94029	Bioluminescent	3	9.16814e-06	27.1398
Sandiviiformes	Sandiviidae	Sandivia melinkovi	[14]	"small peculiar scales"	0.84	0.61	0.99	1.64939	0	0	1.36275	0	0	2.39002	Abrasive	6	0.942516	7	1	2.28325	Bioluminescent	3	1.11098e-07	34.309
Sandiviiformes	Sandiviidae	Sandivia melinkovi	[14]	trunk	0.81	0.51	0.98	2.13962	0	0	1.49583	0	0	2.3739	Abrasive	6	0.255366	7	0.999921	8.96241	Bioluminescent	3	7.68233e-05	27.9103
Sandiviiformes	Sandiviidae	Sandivia angusta	[14]	head	0.88	0.91	0.97	0.829561	0	0	1.29031	0	0	3.66132	Abrasive	6	0.96533	7	1	1.89681	Bioluminescent	1	1.52294e-09	42.5021
Sandiviiformes	Sandiviidae	Sandivia angusta	[14]	transitional	0.74	0.45	0.98	2.1789	0	0	1.33559	0	0	2.36842	Abrasive	6	0.31669	7	0.967428	8.18351	Bioluminescent	3	0.032572	14.9659
Sandiviiformes	Sandiviidae	Sandivia angusta	[14]	trunk	0.76	0.45	0.99	2.55124	0	0	0.874661	0	0	2.71884	Abrasive	6	0.0124251	7	0.87354	17.9009	Bioluminescent	3	0.12646	21.7662
Sandiviiformes	Stroinolepididae	Stroinolepis maenniki	[15]	head	0.82	0.55	0.97	1.73558	0	0	1.41587	0	0	2.50416	Abrasive	6	0.883472	7	0.999999	3.0165	Bioluminescent	1	3.04825e-07	33.0236
Sandiviiformes	Stroinolepididae	Stroinolepis maenniki	[15]	transitional	0.84	0.55	0.99	1.84236	0	0	1.33958	0	0	2.45722	Abrasive	6	0.790069	7	0.999999	3.91013	Bioluminescent	3	6.11298e-07	32.5255
Sandiviiformes	Stroinolepididae	Stroinolepis maenniki	[15]	trunk-pinnal	0.85	0.61	0.99	1.56118	0	0	1.30709	0	0	2.68649	Abrasive	6	0.973951	7	1	1.7143	Bioluminescent	3	1.84908e-08	37.3263
Sandiviiformes	Stroinolepididae	Valyalepis crista	[16]	rostral	0.84	0.83	0.95	1.18848	0	0	1.32767	0	0	3.0859	Abrasive	6	0.995429	7	1	0.961273	Bioluminescent	1	6.63465e-08	34.018
Sandiviiformes	Stroinolepididae	Valyalepis crista	[16]	postpectoral, precaudal and pinnal	0.84	0.67	0.98	1.49845	0	0	1.54303	0	0	2.54132	Abrasive	6	0.875779	7	1	3.09813	Bioluminescent	1	4.05413e-07	32.5348
Sandiviiformes	Stroinolepididae	Valyalepis crista	[16]	cephalo-pectoral	0.84	0.56	1	1.84375	0	0	1.35609	0	0	2.43937	Abrasive	6	0.766444	7	0.999999	4.11497	Bioluminescent	3	1.45605e-06	30.9945
Sandiviiformes	Angaralepididae	Angaralepis moskalenkoae	[14]	head	0.94	0.85	0.98	0.95183	0	0	1.3241	0	0	3.26113	Abrasive	6	0.637613	7	1	5.18324	Bioluminescent	1	3.16995e-09	44.3223
Sandiviiformes	Angaralepididae	Angaralepis moskalenkoae	[14]	transitional	0.91	0.94	0.97	0.921397	0	0	1.13989	0	0	3.62085	Abrasive	6	0.733612	7	1	4.39257	Bioluminescent	1	2.61443e-10	48.5222
Sandiviiformes	Angaralepididae	Angaralepis moskalenkoae	[14]	trunk	0.89	0.94	0.98	0.955782	0.501779	0.359411	1.49351	0.725979	0.3879	3.14591	Abrasive	7	0.770923	7	0.99947	4.07652	Hydrodynamic	5	0.000457679	19.4541
?Sandiviiformes	incertae sedis	Larolepis darbyi	[17]	unknown	0.86	0.59	1	1.67832	0	0	1.26909	0	0	2.62083	Abrasive	6	0.907354	7	1	2.7473	Bioluminescent	3	4.70234e-08	36.4925
Loganelliiformes	Loganelliidae	Loganellia aldridgei	[18]	pinnal	0.49	0.24	1	3.24742	0.707937	2.56626	1.57679	0.787302	0.11746	2.25079	Generalized	8	7.99009e-12	7	0.87673	66.3655	Abrasive	7	0.12327	70.2892
Loganelliiformes	Loganelliidae	Loganellia aldridgei	[18]	transitional/trunk	0.61	0.45	0.95	2.31492	0.663484	1.56369	1.53446	0.885442	0.53222	2.41766	Generalized	8	0.191593	7	0.999334	9.94706	Abrasive	7	0.000665879	24.5745
Loganelliiformes	Loganelliidae	Loganellia aldridgei	[19]	head	0.9	0.82	0.98	1.11623	0	0	1.35552	0	0	3.03143	Abrasive	6	0.937827	7	1	2.35195	Bioluminescent	1	6.88327e-09	39.9403
Loganelliiformes	Loganelliidae	Loganellia almgreeni	[20]	head	0.9	0.81	0.98	1.375	0	0	1.29076	0	0	2.80519	Abrasive	6	0.855463	7	1	3.30465	Bioluminescent	1	7.14696e-09	40.8178
Loganelliiformes	Loganelliidae	Loganellia almgreeni	[20]	transitional	0.82	0.64	0.97	1.5885	0	0	1.49064	0	0	2.54875	Abrasive	6	0.932448	7	0.999999	2.42763	Bioluminescent	1	5.6021e-07	31.2175
Loganelliiformes	Loganelliidae	Loganellia almgreeni	[20]	trunk	0.89	0.72	0.98	1.34211	0.588235	0.612818	1.3196	0.857843	0.519608	2.82353	Abrasive	7	0.292216	7	0.657924	8.47948	Hydrodynamic	5	0.309207	9.98963
Loganelliiformes	Loganelliidae	Loganellia asiatica	[21]	head	0.84	0.81	0.96	1.27168	0	0	1.7576	0	0	2.59545	Abrasive	6	0.45917	7	0.999958	6.71477	Bioluminescent	1	4.24141e-05	26.8507
Loganelliiformes	Loganelliidae	Loganellia asiatica	[21]	transitional	0.85	0.62	0.99	1.56997	0	0	1.39535	0	0	2.59348	Abrasive	6	0.949228	7	1	2.17971	Bioluminescent	3	2.43145e-08	37.2441
Loganelliiformes	Loganelliidae	Loganellia asiatica	[21]	trunk	0.86	0.73	0.98	1.41401	0.621622	0.824585	1.50914	0.722973	0.286036	2.61486	Abrasive	7	0.700383	7	0.999851	4.66818	Hydrodynamic	5	0.000148905	22.2923
Loganelliiformes	Loganelliidae	Loganellia avonia	[19]	head	0.91	0.72	0.99	1.37681	0	0	1.29105	0	0	2.79474	Abrasive	6	0.83395	7	1	3.51203	Bioluminescent	1	2.88748e-09	42.8378
Loganelliiformes	Loganelliidae	Loganellia avonia	[19]	transitional	0.91	0.8	0.99	1.21406	0	0	1.43793	0	0	2.81053	Abrasive	6	0.800038	7	1	3.82199	Bioluminescent	1	1.64172e-08	39.6719
Loganelliiformes	Loganelliidae	Loganellia avonia	[19]	trunk	0.82	0.66	0.99	1.885	0	0	1.32604	0	0	2.48276	Abrasive	6	0.795895	7	0.999995	3.85875	Bioluminescent	3	4.96511e-06	28.2849
Loganelliiformes	Loganelliidae	Loganellia cuneata	[22]	head	0.75	0.94	0.92	1.04021	0	0	1.61799	0	0	3.16495	Abrasive	6	0.989899	7	0.999965	1.24314	Bioluminescent	1	3.46636e-05	21.7827
Loganelliiformes	Loganelliidae	Loganellia cuneata	[22]	trunk	0.82	0.6	0.99	1.99556	0	0	1.22244	0	0	2.5078	Abrasive	6	0.67372	7	0.999989	4.88725	Bioluminescent	3	1.08151e-05	27.7564
Loganelliiformes	Loganelliidae	Loganellia cuneata	[22]	trunk	0.69	0.42	0.99	2.34309	0.779796	1.99746	1.40193	0.938706	0.333712	2.35074	Generalized	8	0.0028827	7	0.709613	21.681	Abrasive	7	0.28934	23.4753
Loganelliiformes	Loganelliidae	Loganellia cuneata	[22]	transitional	0.75	0.65	0.93	1.54375	0	0	1.80323	0	0	2.45951	Abrasive	6	0.450816	7	0.997677	6.79235	Bioluminescent	1	0.00232106	18.9192
Loganelliiformes	Loganelliidae	Loganellia einari	[23]	rostral	0.74	0.72	0.89	1.32143	0	0	1.41793	0	0	3.19958	Abrasive	6	0.848777	7	0.999917	3.37019	Bioluminescent	1	8.28848e-05	22.1661
Loganelliiformes	Loganelliidae	Loganellia einari	[23]	cephalo-pectoral	0.66	0.44	0.98	2.33871	0.948276	3.23253	1.53708	1	0.268966	2.3	Generalized	8	8.19789e-06	7	0.960467	35.7168	Abrasive	7	0.0376003	42.1976
Loganelliiformes	Loganelliidae	Loganellia einari	[23]	postpectoral and precaudal	0.61	0.43	0.93	2.11084	0.578767	1.26927	1.79511	0.875571	0.33105	2.34018	Generalized	8	0.399187	7	0.999994	7.29136	Abrasive	7	5.94236e-06	31.3582
Loganelliiformes	Loganelliidae	Loganellia einari	[23]	pinnal	0.75	0.55	0.96	1.95513	0.603279	0.963296	1.35378	0.859016	0.459016	2.52459	Generalized	8	0.53637	7	0.940303	6.02898	Abrasive	7	0.0595922	11.5463
Loganelliiformes	Loganelliidae	Loganellia exilis	[5]	rostral	0.96	0.85	1	1.23462	0	0	1.30416	0	0	2.84735	Abrasive	6	0.438559	7	1	6.90764	Bioluminescent	1	1.22191e-09	47.9533
Loganelliiformes	Loganelliidae	Loganellia exilis	[5]	cephalo-pectoral	0.82	0.61	1	1.82828	0	0	1.37945	0	0	2.46133	Abrasive	6	0.791701	7	0.999992	3.89578	Bioluminescent	3	7.55826e-06	27.4815
Loganelliiformes	Loganelliidae	Loganellia exilis	[5]	postpectoral, precaudal and pinnal	0.74	0.61	0.99	2.34016	0.330123	0.36362	1.42578	0.357268	0.0542907	2.25569	Abrasive	7	1.10281e-06	7	0.90505	40.3	Abrasive	6	0.0927535	44.8561
Loganelliiformes	Loganelliidae	Loganellia exilis	[5]	postpectoral, precaudal and pinnal	0.68	0.44	0.97	2.10145	0.708046	1.61421	1.53221	1	0.749425	2.38851	Generalized	8	0.616056	7	0.999984	5.36053	Abrasive	7	1.18303e-05	28.0502
Loganelliiformes	Loganelliidae	Loganellia grossi	[23]	head and transitional	0.91	0.85	0.97	0.730159	0	0	1.17363	0	0	4.02484	Abrasive	6	0.702772	7	1	4.64848	Bioluminescent	1	2.01171e-10	49.3022
Loganelliiformes	Loganelliidae	Loganellia grossi	[23]	trunk	0.92	0.78	0.98	1.47411	0	0	1.4445	0	0	2.53235	Abrasive	6	0.333902	7	1	7.98519	Bioluminescent	1	1.75989e-07	39.0909
Loganelliiformes	Loganelliidae	Loganellia incompta	[14]	head	0.95	0.94	0.98	0.912281	0	0	1.27387	0	0	3.3774	Abrasive	6	0.541658	7	1	5.98367	Bioluminescent	1	1.30117e-09	46.9037
Loganelliiformes	Loganelliidae	Loganellia incompta	[14]	transitional	0.89	0.71	0.98	1.35214	0	0	1.27697	0	0	2.85309	Abrasive	6	0.931608	7	1	2.43916	Bioluminescent	1	4.60182e-09	40.8328
Loganelliiformes	Loganelliidae	Loganellia incompta	[14]	trunk	0.9	0.66	0.99	1.4323	0	0	1.29171	0	0	2.74129	Abrasive	6	0.871635	7	1	3.14125	Bioluminescent	1	3.30921e-09	42.1944
Loganelliiformes	Loganelliidae	Loganellia matura	[15]	head	0.85	0.72	0.96	1.37066	0.309859	0.17709	1.34566	0.442254	0.276056	2.83944	Abrasive	7	0.00421831	7	0.999992	20.7134	Abrasive	6	8.12379e-06	44.1548
Loganelliiformes	Loganelliidae	Loganellia matura	[15]	transitional	0.86	0.6	0.98	1.79518	0	0	1.31985	0	0	2.48098	Abrasive	6	0.727299	7	1	4.44526	Bioluminescent	1	4.4831e-08	38.286
Loganelliiformes	Loganelliidae	Loganellia matura	[15]	trunk	0.89	0.64	0.99	1.53846	0	0	1.09694	0	0	2.89375	Abrasive	6	0.806869	7	1	3.76089	Bioluminescent	3	2.94116e-10	47.655
Loganelliiformes	Loganelliidae	Loganellia sibirica	[21]	head	0.93	0.76	0.99	1.31667	0	0	1.26368	0	0	2.84177	Abrasive	6	0.692854	7	1	4.73016	Bioluminescent	1	1.77529e-09	45.0288
Loganelliiformes	Loganelliidae	Loganellia sibirica	[21]	transitional	0.81	0.59	0.97	2.131	0	0	1.158	0	0	2.5123	Abrasive	6	0.451361	7	0.999985	6.78727	Bioluminescent	3	1.4911e-05	29.0141
Loganelliiformes	Loganelliidae	Loganellia sibirica	[21]	trunk	0.83	0.56	0.99	1.63576	0	0	1.54145	0	0	2.45749	Abrasive	6	0.785885	7	0.999999	3.9468	Bioluminescent	3	3.46218e-07	33.6992
Loganelliiformes	Loganelliidae	Loganellia tuvaensis	[20]	head	0.93	0.94	0.97	0.996169	0	0	1.26643	0	0	3.27308	Abrasive	6	0.65348	7	1	5.05313	Bioluminescent	1	3.69221e-09	43.8872
Loganelliiformes	Loganelliidae	Loganellia tuvaensis	[20]	transitional	0.92	0.77	0.98	1.21721	0	0	1.39218	0	0	2.84512	Abrasive	6	0.678877	7	1	4.84496	Bioluminescent	1	2.44815e-08	39.8957
Loganelliiformes	Loganelliidae	Loganellia tuvaensis	[20]	trunk	0.86	0.62	0.98	1.58202	0	0	1.45528	0	0	2.52699	Abrasive	6	0.823362	7	1	3.61073	Bioluminescent	1	1.69713e-07	34.7891
Loganelliiformes	Loganelliidae	Loganellia unispinata	[24]	trunk	0.82	0.56	0.99	1.86705	0	0	1.37265	0	0	2.43963	Abrasive	6	0.787555	7	0.999995	3.93218	Bioluminescent	3	4.67154e-06	28.4802
Loganelliiformes	Loganelliidae	Loganellia unispinata	[24]	trunk	0.62	0.47	0.93	2.32353	0.652803	1.43688	1.45114	0.981917	0.520796	2.44485	Generalized	8	0.566866	7	1	5.76984	Abrasive	7	4.66315e-08	39.5318
Loganelliiformes	Loganelliidae	Talimaalepis rimae	[25]	rostral	0.89	0.74	0.99	1.26113	0.289412	0.134014	1.2687	0.310588	0.0376471	2.96706	Abrasive	6	8.64332e-05	7	0.939175	30.2226	Abrasive	7	0.0608252	35.6966
Loganelliiformes	Loganelliidae	Talimaalepis rimae	[26]	cephalo-pectoral	0.41	0.34	0.84	3.01786	0.617751	1.73671	1.508	0.926627	0.460355	2.59408	Generalized	8	0.000247681	7	1	27.7145	Abrasive	7	9.25772e-12	78.5256
Loganelliiformes	Loganelliidae	Talimaalepis rimae	[25]	postpectoral, precaudal and pinnal	0.63	0.66	0.87	1.56136	0.683946	1.21136	1.65855	0.964883	0.446488	2.77258	Generalized	8	0.999976	7	0.999993	0.198129	Abrasive	7	6.84512e-06	23.9821
Loganelliiformes	Loganelliidae	Talimaalepis kadvoiensis	[25]	rostral	0.88	0.67	0.99	1.36898	0	0	0.97684	0	0	3.26172	Abrasive	6	0.646531	7	1	5.11008	Bioluminescent	3	1.15194e-10	50.8789
Loganelliiformes	Loganelliidae	Talimaalepis kadvoiensis	[25]	cephalo-pectoral	0.56	0.41	0.94	2.41827	0.681909	1.59817	1.42123	1	0.520875	2.54672	Generalized	8	0.080777	7	1	12.6623	Abrasive	7	7.6824e-09	50.0309
Loganelliiformes	Loganelliidae	Talimaalepis kadvoiensis	[25]	postpectoral, precaudal and pinnal	0.61	0.51	0.89	1.975	0.628165	1.32541	1.70074	1	0.561709	2.47943	Generalized	8	0.59392	7	1	5.54369	Abrasive	7	1.11445e-09	46.7735
Loganelliiformes	Nunavutiidae	Nunavutia fasciata	[5]	trunk	0.69	0.51	0.95	2.02564	0.781193	1.86635	1.50978	0.96745	0.475588	2.434	Generalized	8	0.0647517	7	0.963832	13.317	Abrasive	7	0.0334114	20.041
Shieliiformes	Shieliidae	Shielia gibba	[5]	cephalo-pectoral	0.48	0.98	0.85	1.21591	1	2.19435	1.8047	1	0	3.47196	Defensive	4	7.73057e-08	7	0.999906	46.2743	Abrasive	7	8.62103e-05	64.9916
Shieliiformes	Shieliidae	Shielia gibba	[5]	postpectoral and precaudal	0.64	0.48	0.93	2.22115	1	3.43356	1.54585	1	0	2.4026	Defensive	4	5.87601e-06	7	1	36.4829	Abrasive	7	1.23329e-11	86.7204
Shieliiformes	Shieliidae	Shielia multispinata	[15]	head and transitional	0.89	0.87	0.98	1.05325	0	0	1.41967	0	0	3.07865	Abrasive	6	0.964504	7	1	1.91288	Bioluminescent	1	1.35965e-08	38.1398
Shieliiformes	Shieliidae	Shielia multispinata	[15]	trunk	0.5	0.49	0.91	2.10945	1	3.17923	1.50714	1	0	2.82311	Defensive	4	1.94115e-09	7	0.999998	54.4213	Generalized	8	1.61214e-06	81.0972
Shieliiformes	Shieliidae	Shielia parca	[5]	rostral	0.93	0.85	0.98	1.09615	0	0	1.63376	0	0	2.74854	Abrasive	6	0.190294	7	0.999999	9.96976	Bioluminescent	1	9.00628e-07	37.8101
Shieliiformes	Shieliidae	Shielia parca	[5]	cephalo-pectoral	0.94	0.77	0.99	1.14124	0	0	1.45786	0	0	2.82673	Abrasive	6	0.458078	7	1	6.72487	Bioluminescent	1	2.3495e-08	41.8578
Shieliiformes	Shieliidae	Shielia parca	[5]	fin	0.86	0.66	0.98	1.45912	0	0	1.51628	0	0	2.56466	Abrasive	6	0.844937	7	1	3.40737	Bioluminescent	1	2.73985e-07	33.6278
Shieliiformes	Shieliidae	Shielia parca	[5]	postpectoral and precaudal	0.53	0.68	0.84	1.75	1	2.94245	1.6814	1	0	2.84524	Defensive	4	0.000651825	7	1	25.3717	Abrasive	7	6.76766e-12	76.8095
Shieliiformes	Shieliidae	Paralogania kummerowi	[24]	head	0.87	0.58	0.99	1.87855	0	0	1.31325	0	0	2.45186	Abrasive	6	0.587128	7	1	5.60019	Bioluminescent	3	5.92958e-08	38.8816
Shieliiformes	Shieliidae	Paralogania kummerowi	[24]	transitional	0.85	0.59	0.99	1.37356	0	0	1.67219	0	0	2.57477	Abrasive	6	0.62236	7	0.999999	5.30859	Bioluminescent	1	8.06408e-07	33.3699
Shieliiformes	Shieliidae	Paralogania kummerowi	[24]	trunk	0.88	0.75	0.99	1.26682	0	0	1.43496	0	0	2.79928	Abrasive	6	0.960924	7	1	1.98028	Bioluminescent	1	1.39617e-08	38.1542
Shieliiformes	Shieliidae	Paralogania borealis	[21]	head, transitional and trunk	0.87	0.83	0.97	1.0142	0	0	1.59181	0	0	2.996	Abrasive	6	0.888236	7	1	2.96484	Bioluminescent	1	4.47862e-07	32.2024
Shieliiformes	Shieliidae	Paralogania consimilis	[15]	head	0.9	0.67	0.99	1.62162	0	0	1.25196	0	0	2.62857	Abrasive	6	0.720781	7	1	4.49947	Bioluminescent	1	3.86001e-09	43.2447
Shieliiformes	Shieliidae	Paralogania consimilis	[15]	transitional	0.87	0.75	0.98	1.42014	0	0	1.44116	0	0	2.65037	Abrasive	6	0.914717	7	1	2.65825	Bioluminescent	1	7.49812e-08	35.4703
Shieliiformes	Shieliidae	Paralogania consimilis	[15]	trunk	0.71	0.56	0.97	1.7659	1	2.86217	1.6208	1	0	2.49591	Defensive	4	8.60013e-08	7	0.999997	46.0365	Abrasive	7	2.41214e-06	71.9065
Shieliiformes	Shieliidae	Paralogania ex gr. martinssoni	[15]	head	0.89	0.64	0.96	0.764588	0	0	1.27481	0	0	3.81579	Abrasive	6	0.878618	7	1	3.06824	Bioluminescent	1	2.79901e-09	42.4562
Shieliiformes	Shieliidae	Paralogania ex gr. martinssoni	[15]	transitional	0.81	0.53	0.98	1.70968	0	0	1.35152	0	0	2.59774	Abrasive	6	0.946728	7	0.999999	2.21905	Bioluminescent	3	1.11863e-06	29.6259
Shieliiformes	Shieliidae	Paralogania ex gr. martinssoni	[15]	trunk	0.59	0.6	0.9	1.74101	1	2.87012	1.64854	1	0	2.72168	Defensive	4	1.14733e-05	7	1	34.9411	Abrasive	7	2.09717e-08	70.3012
Shieliiformes	Shieliidae	Paralogania foliala	[20]	head	0.81	0.99	0.93	1.10596	0	0	1.52951	0	0	3.03593	Abrasive	6	0.98913	7	0.999993	1.27369	Bioluminescent	1	7.43934e-06	24.8911
Shieliiformes	Shieliidae	Paralogania foliala	[20]	transitional	0.87	0.66	0.99	0.917722	0	0	0.835552	0	0	4.33793	Abrasive	6	0.0868938	7	1	12.4432	Bioluminescent	3	3.31177e-12	65.3103
Shieliiformes	Shieliidae	Paralogania foliala	[20]	trunk	0.93	0.89	0.99	1.12335	0	0	1.46174	0	0	2.86667	Abrasive	6	0.592931	7	1	5.5519	Bioluminescent	1	2.06946e-08	40.9387
Shieliiformes	Shieliidae	Paralogania kaarmisensis	[27]	head	0.84	0.77	0.96	1.19758	0	0	1.43576	0	0	2.94781	Abrasive	6	0.998832	7	1	0.627659	Bioluminescent	1	1.47783e-07	32.0827
Shieliiformes	Shieliidae	Paralogania kaarmisensis	[27]	transitional	0.78	0.66	0.96	1.50114	0	0	1.60007	0	0	2.58994	Abrasive	6	0.933141	7	0.999995	2.41804	Bioluminescent	1	4.22349e-06	27.1677
Shieliiformes	Shieliidae	Paralogania kaarmisensis	[27]	trunk	0.51	0.42	0.85	2.47666	1	4.69429	1.89541	1	0	2.29563	Defensive	4	6.22276e-05	7	1	30.998	Generalized	8	0	146.111
Shieliiformes	Shieliidae	Paralogania kachanovi	[28]	head	0.88	0.7	0.97	1.27056	0	0	1.3909	0	0	2.83646	Abrasive	6	0.937251	7	1	2.3602	Bioluminescent	1	5.38113e-08	35.8358
Shieliiformes	Shieliidae	Paralogania kachanovi	[28]	transitional	0.92	0.74	0.99	1.35246	0	0	1.30238	0	0	2.78485	Abrasive	6	0.750598	7	1	4.2498	Bioluminescent	1	3.51429e-09	43.1827
Shieliiformes	Shieliidae	Paralogania kachanovi	[28]	trunk	0.86	0.81	0.97	1.25099	0	0	1.48206	0	0	2.80253	Abrasive	6	0.969522	7	1	1.81173	Bioluminescent	1	1.79076e-07	32.8826
Shieliiformes	Shieliidae	Paralogania klubovi	[15]	head	0.8	0.89	0.93	1.00893	0	0	1.12653	0	0	3.72566	Abrasive	6	0.670437	7	1	4.91417	Bioluminescent	1	5.45632e-09	42.9672
Shieliiformes	Shieliidae	Paralogania klubovi	[15]	transitional	0.8	0.57	0.95	1.61026	0	0	1.43983	0	0	2.59554	Abrasive	6	0.956178	7	0.999998	2.0646	Bioluminescent	1	1.66315e-06	28.6782
Shieliiformes	Shieliidae	Paralogania klubovi	[15]	trunk	0.7	0.65	0.92	1.65816	1	2.7533	1.66045	1	0	2.56308	Defensive	4	1.55679e-05	7	1	34.2346	Hydrodynamic	5	9.90537e-09	71.095
Shieliiformes	Shieliidae	Paralogania klubovi	[15]	trunk	0.82	0.52	0.99	1.88112	0	0	1.21122	0	0	2.59851	Abrasive	6	0.793396	7	0.999996	3.88084	Bioluminescent	3	3.72444e-06	28.882
Shieliiformes	Shieliidae	Paralogania ludlowiensis	[29]	head	0.36	0.71	0.72	1.44173	1	2.92686	2.03009	1	0	3.44925	Defensive	4	0.0289427	7	1	15.6086	Generalized	8	1.72134e-16	88.2051
Shieliiformes	Shieliidae	Paralogania ludlowiensis	[29]	transitional	0.3	0.63	0.86	1.85928	1	3.08372	1.65856	1	0	3.66667	Defensive	4	1.90625e-16	7	0.988468	89.0856	Generalized	8	0.011527	97.9885
Shieliiformes	Shieliidae	Paralogania ludlowiensis	[29]	trunk	0.37	0.5	0.86	1.78049	1	3.17004	1.78044	1	0	3.27215	Defensive	4	4.76609e-10	7	1	57.4947	Generalized	8	1.52027e-07	88.8931
Shieliiformes	Shieliidae	Paralogania martinssoni	[27]	head	0.8	0.88	0.94	0.996016	0.444	0.255904	1.3033	0.596	0.312	3.476	Abrasive	7	0.20486	7	0.999997	9.72237	Generalized	8	3.33998e-06	34.9415
Shieliiformes	Shieliidae	Paralogania martinssoni	[27]	transitional	0.22	0.8	0.8	0.958824	0.708589	0.949687	1.97266	1	0.509202	5.4908	Generalized	8	4.95226e-13	7	1	72.3462	Abrasive	7	3.17078e-12	125.3
Shieliiformes	Shieliidae	Paralogania martinssoni	[27]	trunk	0.3	0.73	0.86	1.38397	0.594512	0.729203	1.49074	1	0.496951	4.54268	Generalized	8	2.62701e-18	7	1	98.1274	Abrasive	7	8.15925e-15	163.007
Shieliiformes	Shieliidae	Paralogania menneri	[28]	head	0.91	0.82	0.97	1.27907	0	0	1.24341	0	0	2.94727	Abrasive	6	0.748706	7	1	4.26578	Bioluminescent	1	6.77868e-09	41.8848
Shieliiformes	Shieliidae	Paralogania menneri	[28]	transitional	0.84	0.65	0.96	1.45642	0	0	1.40647	0	0	2.70709	Abrasive	6	0.971301	7	1	1.77364	Bioluminescent	1	2.7648e-07	31.9759
Shieliiformes	Shieliidae	Paralogania menneri	[28]	trunk	0.48	0.42	0.82	2.141	1	4.00504	1.87064	1	0	2.54914	Defensive	4	0.00635458	7	1	19.6593	Generalized	8	0	113.409
Shieliiformes	Shieliidae	Paralogania menneri	[28]	trunk	0.79	0.68	0.95	1.46257	0	0	1.65768	0	0	2.55393	Abrasive	6	0.848132	7	0.999971	3.37646	Bioluminescent	1	2.92581e-05	24.2551
Shieliiformes	Shieliidae	Paralogania perensae	[22]	head	0.77	0.84	0.95	1.18864	0	0	1.52937	0	0	2.99484	Abrasive	6	0.999219	7	0.999999	0.555079	Bioluminescent	1	8.54801e-07	28.4999
Shieliiformes	Shieliidae	Paralogania perensae	[22]	transitional	0.81	0.72	0.96	1.41236	0	0	1.55744	0	0	2.65025	Abrasive	6	0.971024	7	0.999998	1.77966	Bioluminescent	1	1.99573e-06	28.0287
Shieliiformes	Shieliidae	Paralogania perensae	[22]	trunk	0.54	0.61	0.86	1.88554	1	3.44222	1.82559	1	0	2.60703	Defensive	4	0.00538057	7	1	20.089	Generalized	8	1.11595e-16	93.5523
Shieliiformes	Shieliidae	Paralogania readbayensis	[5]	transitional	0.9	0.71	0.99	1.51103	0	0	1.41054	0	0	2.55961	Abrasive	6	0.67142	7	1	4.90611	Bioluminescent	1	3.33476e-08	39.3387
Shieliiformes	Shieliidae	Paralogania readbayensis	[5]	trunk	0.68	0.64	0.89	1.67811	1	2.95714	1.76218	1	0	2.49616	Defensive	4	0.00106078	7	1	24.1764	Hydrodynamic	5	5.39907e-13	80.6712
Shieliiformes	Shieliidae	Paralogania readbayensis	[5]	head	0.88	0.79	0.97	1.28319	0.466667	0.372834	1.33417	0.622989	0.337931	2.89425	Abrasive	7	0.816267	7	0.999999	3.67583	Hydrodynamic	5	5.37293e-07	32.5493
Shieliiformes	Shieliidae	Paralogania tarranti	[24]	head	0.92	0.79	0.99	1.07299	0	0	1.35671	0	0	3.05442	Abrasive	6	0.862127	7	1	3.2382	Bioluminescent	1	2.60448e-09	42.7703
Shieliiformes	Shieliidae	Paralogania tarranti	[24]	transitional	0.83	0.57	0.99	1.41525	0	0	1.43745	0	0	2.73054	Abrasive	6	0.990931	7	1	1.19982	Bioluminescent	3	3.70407e-08	35.4223
Shieliiformes	Shieliidae	Paralogania tarranti	[24]	trunk	0.9	0.79	0.99	1.35433	0	0	1.41633	0	0	2.69767	Abrasive	6	0.820411	7	1	3.6379	Bioluminescent	1	1.87193e-08	39.2253
Shieliiformes	Shieliidae	Paralogania wilsoni	[28]	head	0.89	0.68	0.99	1.2511	0	0	1.32391	0	0	2.91549	Abrasive	6	0.973486	7	1	1.72496	Bioluminescent	1	2.31426e-09	41.4933
Shieliiformes	Shieliidae	Paralogania wilsoni	[28]	transitional	0.96	0.87	0.99	1.1058	0	0	1.48587	0	0	2.81173	Abrasive	6	0.211336	7	1	9.617	Bioluminescent	1	4.02152e-08	43.675
Shieliiformes	Shieliidae	Paralogania wilsoni	[28]	trunk	0.89	0.7	0.99	1.30556	0	0	1.48154	0	0	2.70213	Abrasive	6	0.84222	7	1	3.43348	Bioluminescent	1	4.00042e-08	37.502
Shieliiformes	Shieliidae	Valiukia flabellata	[28]	head	0.92	0.95	0.98	0.937824	0	0	1.30821	0	0	3.34254	Abrasive	6	0.850008	7	1	3.35821	Bioluminescent	1	1.82831e-09	43.598
Shieliiformes	Shieliidae	Valiukia flabellata	[28]	transitional	0.94	0.83	0.99	0.95	0	0	1.24411	0	0	3.36316	Abrasive	6	0.736871	7	1	4.3653	Bioluminescent	1	2.97064e-10	48.2394
Shieliiformes	Shieliidae	Valiukia flabellata	[28]	trunk	0.83	0.72	0.96	1.33533	0.520179	0.445371	1.23262	0.748879	0.363229	3.02691	Abrasive	7	0.470278	7	0.994908	6.61278	Generalized	8	0.00505764	17.1763
Shieliiformes	Shieliidae	Nethertonodus prodigialis	[24]	head	0.95	0.91	0.99	1.12409	0	0	1.46463	0	0	2.83117	Abrasive	6	0.335568	7	1	7.96638	Bioluminescent	1	2.73106e-08	42.7984
Shieliiformes	Shieliidae	Nethertonodus prodigialis	[24]	transitional	0.95	0.86	0.99	1.008	0	0	1.05946	0	0	3.53175	Abrasive	6	0.482713	7	1	6.50009	Bioluminescent	1	1.99294e-11	55.7777
Shieliiformes	Shieliidae	Nethertonodus prodigialis	[24]	trunk	0.64	0.56	0.91	1.84043	1	3.40838	1.85195	1	0	2.39306	Defensive	4	0.00140221	7	1	23.4859	Abrasive	7	4.3445e-16	94.2308
Shieliiformes	Shieliidae	Nethertonodus laadjalaensis	[22]	trunk	0.37	0.52	0.87	2.09589	0.686275	1.70718	1.72948	0.986928	0.54902	3.05882	Generalized	8	4.21604e-05	7	1	31.9125	Abrasive	7	1.89073e-11	81.2955
Shieliiformes	Shieliidae	Nethertonodus laadjalaensis	[22]	trunk	0.72	0.8	0.95	1.42857	0.75	1.08738	1.35318	0.96	0.53	3	Generalized	8	0.236501	7	0.761059	9.2309	Abrasive	7	0.22956	11.628
Shieliiformes	Shieliidae	Praetrilogania grabion	[20]	head/transitional	0.93	0.92	0.98	1.02817	0	0	1.29284	0	0	3.19178	Abrasive	6	0.745097	7	1	4.29622	Bioluminescent	1	2.3394e-09	44.043
Shieliiformes	Shieliidae	Praetrilogania grabion	[20]	trunk	0.91	0.84	0.97	1.21577	0.825939	1.1258	1.35742	0.952218	0.259386	2.89761	Hydrodynamic	5	0.110997	7	0.996084	11.6963	Abrasive	7	0.00391561	22.7741
Phlebolepidiformes	Phlebolepididae	Phlebolepis ornata	[7]	rostral	0.9	0.7	0.98	1.31373	0	0	1.34953	0	0	2.80597	Abrasive	6	0.863019	7	1	3.22922	Bioluminescent	1	1.4564e-08	39.3186
Phlebolepidiformes	Phlebolepididae	Phlebolepis ornata	[7]	cephalo-pectoral	0.76	0.45	0.98	2.10811	0.230769	0.127308	1.13399	0.333333	0.141026	2.63462	Abrasive	6	0.000135839	7	0.999118	29.1502	Bioluminescent	3	0.000871045	43.2401
Phlebolepidiformes	Phlebolepididae	Phlebolepis ornata	[7]	postpectoral	0.87	0.78	0.97	1.3012	0.203704	0.0705025	1.30575	0.416667	0.25	2.90741	Abrasive	7	1.10322e-06	7	0.833879	40.2992	Abrasive	6	0.166118	43.526
Phlebolepidiformes	Phlebolepididae	Phlebolepis ornata	[7]	precaudal	0.8	0.48	0.98	1.83636	0.366337	0.307157	1.24635	0.524752	0.326733	2.62376	Abrasive	7	0.0111577	7	0.999997	18.1862	Generalized	8	2.992e-06	43.6253
Phlebolepidiformes	Phlebolepididae	Phlebolepis ornata	[7]	pinnal	0.74	0.41	0.98	2.25	0.347222	0.2989	1.10187	0.541667	0.263889	2.625	Abrasive	7	1.39567e-05	7	0.999052	34.4877	Generalized	8	0.000947483	48.4092
Phlebolepidiformes	Phlebolepididae	Helenolepis obruchevi	[21]	trunk	0.78	0.46	0.99	1.91228	0	0	1.5768	0	0	2.31193	Abrasive	6	0.450071	7	0.999644	6.79931	Bioluminescent	3	0.000355611	22.6819
Phlebolepidiformes	Phlebolepididae	Helenolepis multicostata	[21]	trunk	0.93	0.77	0.99	1.24	0.322581	0.179408	1.39041	0.607527	0.510753	2.80645	Abrasive	7	0.00171453	7	0.999348	22.9855	Generalized	8	0.000648494	37.6659
Phlebolepidiformes	Phlebolepididae	Helenolepis navicularis	[21]	head/transitional	0.96	0.9	0.99	0.96	0	0	1.3303	0	0	3.20833	Abrasive	6	0.47443	7	1	6.57498	Bioluminescent	1	1.62546e-09	47.0499
Phlebolepidiformes	Phlebolepididae	Helenolepis navicularis	[21]	trunk	0.8	0.5	0.99	1.92958	0	0	1.83286	0	0	2.29562	Abrasive	6	0.0362935	7	0.999799	14.9771	Bioluminescent	3	0.000128694	32.8929
Phlebolepidiformes	Katoporididae	Trimerolepis lithuanica	[21]	head	0.88	0.65	0.96	1.32258	0	0	1.15861	0	0	3.07317	Abrasive	6	0.832657	7	1	3.52418	Bioluminescent	1	3.99992e-09	42.1982
Phlebolepidiformes	Katoporididae	Trimerolepis lithuanica	[21]	transitional	0.76	0.62	0.9	1.41667	0	0	1.27301	0	0	3	Abrasive	6	0.76318	7	0.999995	4.14289	Bioluminescent	1	5.03384e-06	28.5415
Phlebolepidiformes	Katoporididae	Trimerolepis lithuanica	[21]	trunk	0.89	0.76	0.96	1.21739	0	0	1.34869	0	0	2.94643	Abrasive	6	0.849704	7	1	3.36117	Bioluminescent	1	6.67982e-08	36.4043
Phlebolepidiformes	Katoporididae	Trimerolepis lithuanica	[21]	trunk	0.58	0.75	0.78	1.43902	1	2.78257	1.93365	1	0	2.79661	Defensive	4	0.156766	7	1	10.6057	Abrasive	7	0	92.7802
Phlebolepidiformes	Katoporididae	Trimerolepis gemella	[5]	head	0.92	0.79	0.98	1.18966	0	0	1.14568	0	0	3.15942	Abrasive	6	0.747785	7	1	4.27356	Bioluminescent	1	3.63756e-10	47.7426
Phlebolepidiformes	Katoporididae	Trimerolepis gemella	[5]	transitional	0.9	0.87	0.98	1.15054	0	0	1.42784	0	0	2.91121	Abrasive	6	0.882591	7	1	3.02595	Bioluminescent	1	2.64918e-08	37.9188
Phlebolepidiformes	Katoporididae	Trimerolepis gemella	[5]	trunk	0.95	0.94	0.99	0.983051	0.862069	1.03969	1.42313	1	0.235632	3.07471	Hydrodynamic	5	0.0793556	7	0.999952	12.7153	Abrasive	7	4.84673e-05	32.5845
Phlebolepidiformes	Katoporididae	Trimerolepis serrata	[5]	head	0.89	0.85	0.97	1.07609	0	0	1.57312	0	0	2.87879	Abrasive	6	0.718615	7	0.999999	4.51745	Bioluminescent	1	5.37412e-07	33.3905
Phlebolepidiformes	Katoporididae	Trimerolepis serrata	[5]	transitional	0.83	0.78	0.94	1.17895	0	0	1.67843	0	0	2.76339	Abrasive	6	0.74206	7	0.999946	4.32176	Bioluminescent	1	5.3844e-05	23.9805
Phlebolepidiformes	Katoporididae	Trimerolepis serrata	[5]	trunk	0.64	0.51	0.92	1.76119	1	3.40149	1.93135	1	0	2.40254	Defensive	4	0.000992708	7	1	24.3399	Abrasive	7	2.75409e-16	95.9965
Phlebolepidiformes	Katoporididae	Trimerolepis timanica	[21]	head	0.9	0.65	0.98	1.49123	0	0	1.11047	0	0	2.90588	Abrasive	6	0.729963	7	1	4.42304	Bioluminescent	1	5.91179e-10	46.9208
Phlebolepidiformes	Katoporididae	Trimerolepis timanica	[21]	transitional	0.92	0.79	0.98	1.34426	0	0	1.38291	0	0	2.70732	Abrasive	6	0.575842	7	1	5.69448	Bioluminescent	1	3.62408e-08	39.9606
Phlebolepidiformes	Katoporididae	Trimerolepis timanica	[21]	trunk	0.83	0.66	0.96	1.40351	0	0	1.49901	0	0	2.675	Abrasive	6	0.972003	7	0.999999	1.75824	Bioluminescent	1	9.13623e-07	29.5699
Phlebolepidiformes	Katoporididae	Trimerolepis tricava	[21]	head	0.96	0.93	0.94	1.15789	0	0	1.21689	0	0	3.22727	Abrasive	6	0.0438554	7	1	14.442	Bioluminescent	1	1.0097e-07	46.6589
Phlebolepidiformes	Katoporididae	Trimerolepis tricava	[21]	transitional	0.83	0.6	0.98	1.83607	0	0	1.45486	0	0	2.375	Abrasive	6	0.687623	7	0.999999	4.77316	Bioluminescent	3	7.81018e-07	32.8985
Phlebolepidiformes	Katoporididae	Trimerolepis tricava	[21]	trunk	0.59	0.53	0.89	2.04878	1	3.26214	1.59223	1	0	2.54762	Defensive	4	7.8583e-05	7	1	30.4476	Abrasive	7	5.59677e-12	82.2653
Phlebolepidiformes	Katoporididae	Goniporus alatus	[21]	head	0.96	0.92	0.97	1.05714	0	0	1.145	0	0	3.2973	Abrasive	6	0.27043	7	1	8.75894	Bioluminescent	1	8.98149e-10	50.4203
Phlebolepidiformes	Katoporididae	Goniporus alatus	[21]	transitional	0.91	0.7	0.97	1.38462	0	0	1.36665	0	0	2.7037	Abrasive	6	0.574966	7	1	5.70181	Bioluminescent	1	8.24834e-08	38.3231
Phlebolepidiformes	Katoporididae	Goniporus alatus	[21]	trunk	0.89	0.78	0.97	1.36364	0	0	1.55569	0	0	2.58333	Abrasive	6	0.489695	7	0.999999	6.43746	Bioluminescent	1	1.38483e-06	33.4173
Phlebolepidiformes	Katoporodidae	Niurolepis susanae	[30]	head	0.89	0.82	0.97	1.05714	0.274131	0.102974	1.29622	0.366795	0.189189	3.20849	Abrasive	7	0.000130562	7	0.830899	29.2445	Abrasive	6	0.169101	32.4285
Phlebolepidiformes	Katoporodidae	Niurolepis susanae	[30]	transitional	0.89	0.67	0.99	1.61255	0.206711	0.0900445	1.30681	0.302013	0.161074	2.59329	Abrasive	6	0.000422586	7	0.998559	26.426	Abrasive	7	0.00144098	39.5079
Phlebolepidiformes	Katoporodidae	Niurolepis susanae	[30]	trunk	0.39	0.58	0.86	1.73742	1	2.82504	1.626	1	0	3.36902	Defensive	4	1.80888e-11	7	0.999341	64.6008	Generalized	8	0.000642822	79.2987
Phlebolepidiformes	Katoporididae	Zueguelepis potanus	[31]	head	0.93	0.8	0.99	1.14189	0.449704	0.268714	1.16362	0.60355	0.289941	3.19527	Abrasive	7	0.452168	7	1	6.77974	Hydrodynamic	5	2.98189e-07	36.8308
Phlebolepidiformes	Katoporididae	Zueguelepis potanus	[31]	transitional	0.95	0.79	0.99	1.21429	0.306723	0.145677	1.2752	0.504202	0.344538	2.92017	Abrasive	7	0.00634196	7	1	19.6644	Generalized	8	1.05656e-07	51.7906
Phlebolepidiformes	Katoporididae	Zueguelepis potanus	[31]	trunk	0.64	0.4	0.97	2.45614	1	3.66475	1.49208	1	0	2.31429	Defensive	4	2.68703e-08	7	1	48.6249	Abrasive	7	1.46216e-10	93.9168
Phlebolepidiformes	Katoporididae	Overia adraini	[5]	head	0.78	0.88	0.94	1.0066	0.298361	0.12677	1.41474	0.377049	0.127869	3.36066	Abrasive	6	0.000160748	7	0.82685	28.7491	Abrasive	7	0.17315	31.876
Phlebolepidiformes	Katoporididae	Overia adraini	[5]	head	0.82	0.66	0.96	1.42424	0	0	1.10626	0	0	3.12766	Abrasive	6	0.873037	7	1	3.12672	Bioluminescent	3	3.96479e-09	41.8184
Phlebolepidiformes	Katoporididae	Overia adraini	[5]	transitional	0.94	0.73	0.99	1.39834	0.356083	0.235691	1.32931	0.394659	0.0801187	2.67953	Abrasive	7	0.00128009	7	1	23.7118	Abrasive	6	8.85634e-08	56.1909
Phlebolepidiformes	Katoporididae	Overia adraini	[5]	transitional	0.85	0.58	0.99	1.55605	0	0	1.45085	0	0	2.55331	Abrasive	6	0.917434	7	1	2.6245	Bioluminescent	1	4.48702e-08	36.4635
Phlebolepidiformes	Katoporididae	Overia adraini	[5]	trunk	0.83	0.57	0.98	1.73367	0.446377	0.444744	1.28748	0.576812	0.176812	2.61159	Abrasive	7	0.378047	7	1	7.50716	Generalized	8	2.3585e-07	38.0273
Phlebolepidiformes	Katoporididae	Overia adraini	[5]	trunk	0.61	0.5	0.91	2.22024	0.595174	1.39063	1.76817	0.975871	0.530831	2.28686	Generalized	8	0.258444	7	1	8.92009	Abrasive	7	8.08176e-10	50.7926
Thelodontiformes	Thelodontididae	Thelodus parvidens	[14]	head	0.78	0.91	0.93	1.12838	0	0	1.36049	0	0	3.24551	Abrasive	6	0.995775	7	1	0.937476	Bioluminescent	1	3.53021e-07	30.651
Thelodontiformes	Thelodontididae	Thelodus parvidens	[14]	transitional	0.87	0.77	0.98	1.25191	0	0	1.29072	0	0	2.98171	Abrasive	6	0.993453	7	1	1.07891	Bioluminescent	1	2.99654e-09	40.3305
Thelodontiformes	Thelodontididae	Thelodus parvidens	[14]	trunk	0.82	0.92	0.95	1.15827	0	0	1.68898	0	0	2.80124	Abrasive	6	0.866444	7	0.999981	3.19451	Bioluminescent	1	1.8673e-05	24.9713
Thelodontiformes	Thelodontididae	Thelodus admirabilis	[14]	unknown	0.94	0.91	0.98	0.90625	0	0	1.37233	0	0	3.27586	Abrasive	6	0.614223	7	1	5.37564	Bioluminescent	1	5.80168e-09	43.3059
Thelodontiformes	Thelodontididae	Thelodus admirabilis	[14]	unknown	0.9	0.73	0.97	1.15942	0	0	1.50204	0	0	2.8375	Abrasive	6	0.692954	7	1	4.72934	Bioluminescent	1	2.64658e-07	35.019
Thelodontiformes	Thelodontididae	Thelodus calvus	[15]	trunk	0.92	0.77	0.99	1.20588	0	0	1.28464	0	0	2.96951	Abrasive	6	0.848549	7	1	3.37241	Bioluminescent	1	1.39442e-09	44.154
Thelodontiformes	Thelodontididae	Thelodus carinatus	[14]	head	0.92	0.78	0.98	0.734694	0	0	1.32532	0	0	3.75	Abrasive	6	0.826309	7	1	3.58346	Bioluminescent	1	1.0144e-09	45.0014
Thelodontiformes	Thelodontididae	Thelodus carinatus	[14]	transitional	0.85	0.71	0.98	1.21176	0	0	1.5523	0	0	2.79612	Abrasive	6	0.968375	7	1	1.83563	Bioluminescent	1	1.54429e-07	33.2027
Thelodontiformes	Thelodontididae	Thelodus carinatus	[14]	trunk	0.88	0.72	0.98	1.15116	0.494949	0.408056	1.44697	0.535354	0.0808081	2.91919	Abrasive	7	0.139485	7	1	10.9802	Hydrodynamic	5	4.0628e-09	49.623
Thelodontiformes	Thelodontididae	Thelodus carinatus	[14]	trunk	0.59	0.4	0.93	2.31429	0.851852	2.72368	1.62185	0.987654	0.432099	2.37037	Generalized	8	3.08263e-05	7	0.998433	32.6451	Abrasive	7	0.00155923	45.5691
Thelodontiformes	Thelodontididae	Thelodus laevis	[14]	head	0.87	0.68	0.98	1.55556	0	0	1.08062	0	0	2.94286	Abrasive	6	0.813734	7	1	3.69887	Bioluminescent	3	8.33717e-10	45.5091
Thelodontiformes	Thelodontididae	Thelodus laevis	[14]	transitional	0.87	0.65	0.99	1.61333	0	0	1.35589	0	0	2.57025	Abrasive	6	0.876653	7	1	3.08895	Bioluminescent	1	1.48916e-08	39.1339
Thelodontiformes	Thelodontididae	Thelodus laevis	[14]	trunk	0.96	0.87	0.99	1.08911	0	0	1.48868	0	0	2.84545	Abrasive	6	0.215385	7	1	9.55247	Bioluminescent	1	3.94104e-08	43.6509
Thelodontiformes	Thelodontididae	Thelodus laevis	[14]	trunk	0.53	0.37	0.92	2.76923	0.791667	2.95364	1.70182	1	0.625	2.23611	Generalized	8	0.00010762	7	1	29.7034	Abrasive	7	1.29593e-07	61.4212
Thelodontiformes	Thelodontididae	Thelodus marginatus	[21]	head	0.94	0.83	0.98	0.838384	0	0	1.20396	0	0	3.63855	Abrasive	6	0.631901	7	1	5.23014	Bioluminescent	1	2.65066e-10	49.3322
Thelodontiformes	Thelodontididae	Thelodus marginatus	[21]	transitional	0.87	0.65	0.98	1.50746	0	0	1.38953	0	0	2.62376	Abrasive	6	0.902697	7	1	2.80198	Bioluminescent	1	4.63248e-08	36.5772
Thelodontiformes	Thelodontididae	Thelodus marginatus	[21]	trunk	0.77	0.6	0.97	1.64103	0	0	1.44549	0	0	2.63281	Abrasive	6	0.943589	7	0.999989	2.26713	Bioluminescent	3	1.04588e-05	25.2032
Thelodontiformes	Thelodontididae	Thelodus marginatus	[21]	trunk	0.72	0.45	0.98	1.69118	0.608696	1.21468	1.93852	0.956522	0.765217	2.31304	Generalized	8	0.135177	7	0.999956	11.0798	Hydrodynamic	5	3.13613e-05	31.8196
Thelodontiformes	Thelodontididae	Thelodus matukhini	[21]	head	0.89	0.63	0.99	1.67123	0	0	1.25243	0	0	2.59836	Abrasive	6	0.751391	7	1	4.24309	Bioluminescent	1	4.29972e-09	42.7725
Thelodontiformes	Thelodontididae	Thelodus matukhini	[21]	transitional	0.91	0.68	0.98	1.2807	0	0	1.27756	0	0	2.90411	Abrasive	6	0.834121	7	1	3.51042	Bioluminescent	1	4.28615e-09	42.0462
Thelodontiformes	Thelodontididae	Thelodus matukhini	[21]	trunk	0.79	0.59	0.96	1.68852	0.495146	0.558035	1.34799	0.582524	0.135922	2.64078	Abrasive	7	0.410819	7	1	7.17569	Generalized	8	5.51712e-08	40.6013
Thelodontiformes	Thelodontididae	Thelodus matukhini	[21]	trunk	0.55	0.54	0.83	1.8125	0.770115	2.00491	1.86512	0.954023	0.333333	2.58621	Generalized	8	0.0386408	7	0.99996	14.8007	Abrasive	7	4.01207e-05	35.0479
Thelodontiformes	Thelodontididae	Thelodus sculptilis	[14]	head	0.86	0.7	0.99	0.653846	0	0	1.52401	0	0	3.83282	Abrasive	6	0.937835	7	1	2.35183	Bioluminescent	1	3.50115e-09	41.2922
Thelodontiformes	Thelodontididae	Thelodus sculptilis	[14]	transitional	0.87	0.69	0.96	1.31579	0	0	1.50198	0	0	2.7	Abrasive	6	0.799991	7	0.999999	3.8224	Bioluminescent	1	1.03498e-06	31.3847
Thelodontiformes	Thelodontididae	Thelodus sculptilis	[14]	trunk	0.92	0.91	0.96	0.90566	0	0	1.45788	0	0	3.22917	Abrasive	6	0.551522	7	1	5.89959	Bioluminescent	1	1.50391e-07	37.3196
Thelodontiformes	Thelodontididae	Thelodus traquairi	[32]	postpectoral	0.83	0.79	0.97	1.1677	0.361702	0.224542	1.46982	0.521277	0.260638	2.96809	Abrasive	7	0.0647817	7	1	13.3156	Generalized	8	4.06216e-07	42.7484
Thelodontiformes	Thelodontididae	Thelodus trilobatus	[24]	head	0.91	0.91	0.98	0.96748	0	0	1.62255	0	0	2.96639	Abrasive	6	0.497516	7	1	6.36782	Bioluminescent	1	3.41833e-07	36.1457
Thelodontiformes	Thelodontididae	Thelodus trilobatus	[24]	transitional/trunk	0.54	0.43	0.87	2.15278	0.735484	2.11386	1.81522	1	0.63871	2.44516	Generalized	8	0.256047	7	1	8.95301	Abrasive	7	2.7116e-08	43.7993
Thelodontiformes	Thelodontididae	Thelodus visvaldi	[28]	head/transitional	0.96	0.91	0.99	0.919283	0	0	1.34093	0	0	3.26829	Abrasive	6	0.478266	7	1	6.54022	Bioluminescent	1	1.62788e-09	47.0122
Thelodontiformes	Thelodontididae	Thelodus visvaldi	[28]	trunk	0.96	0.91	0.99	1.23353	0.815534	0.990837	1.20772	0.985437	0.427184	2.96117	Hydrodynamic	5	0.46734	7	0.999812	6.63963	Abrasive	7	0.000187963	23.7978
Thelodontiformes	Thelodontididae	Parathelodus scitulus	[33]	trunk	0.93	0.85	0.99	0.855124	0	0	1.51796	0	0	3.22314	Abrasive	6	0.615363	7	1	5.36624	Bioluminescent	1	1.66099e-08	41.1928
Thelodontiformes	Thelodontididae	Parathelodus asiaticus	[33]	trunk	0.92	0.84	0.99	0.840278	0	0	1.52832	0	0	3.2562	Abrasive	6	0.708395	7	1	4.60206	Bioluminescent	1	1.65254e-08	40.4388
Thelodontiformes	Thelodontididae	Parathelodus asiaticus	[34]	head/transitional	0.92	0.8	0.99	0.866906	0	0	1.46601	0	0	3.28216	Abrasive	6	0.802729	7	1	3.79799	Bioluminescent	1	6.58799e-09	41.474
Thelodontiformes	Thelodontididae	Parathelodus catalatus	[33]	trunk	0.84	0.65	0.98	0.788889	0	0	1.44774	0	0	3.61502	Abrasive	6	0.992737	7	1	1.11585	Bioluminescent	1	3.94977e-09	39.8151
Thelodontiformes	Thelodontididae	Parathelodus cornuformis	[33]	trunk	0.86	0.61	0.99	1.51079	0	0	1.31694	0	0	2.71429	Abrasive	6	0.974653	7	1	1.69801	Bioluminescent	3	5.01372e-09	39.9202
Thelodontiformes	Thelodontididae	Parathelodus trilobatus	[33]	trunk	0.91	0.73	0.99	1.35878	0	0	1.32692	0	0	2.77528	Abrasive	6	0.824123	7	1	3.60369	Bioluminescent	1	4.84587e-09	41.894
Thelodontiformes	Archipelepididae	Archipelepis turbinata	[10]	anterolateral	0.91	0.7	1	1.52361	0.361186	0.229398	1.15412	0.591644	0.401617	2.79784	Abrasive	7	0.015927	7	0.999976	17.2375	Generalized	8	2.40667e-05	38.5069
Thelodontiformes	Archipelepididae	Archipelepis turbinata	[10]	trunk	0.89	0.76	0.99	0.696897	0.376712	0.152485	1.54184	0.482877	0.208904	3.62671	Abrasive	7	0.0512051	7	1	13.9987	Abrasive	6	2.48368e-10	58.2309
Thelodontiformes	Archipelepididae	Archipelepis turbinata	[10]	pinnal	0.87	0.7	0.99	0.685981	0.435967	0.220022	1.68751	0.337875	0.0544959	3.52589	Abrasive	7	9.83313e-09	7	0.999997	50.8501	Abrasive	6	2.59816e-06	76.5715
Thelodontiformes	Archipelepididae	Archipelepis bifurcata	[5]	unknown	0.76	0.91	0.93	1.19492	0.326241	0.170124	1.33767	0.617021	0.439716	3.21277	Abrasive	7	0.0001047	7	0.993249	29.7686	Generalized	8	0.00673893	39.7548
Thelodontiformes	Boothialepididae	Boothialepis throsteinssoni	[35]	head	0.94	0.76	0.99	1.30526	0	0	1.3728	0	0	2.73387	Abrasive	6	0.464521	7	1	6.66548	Bioluminescent	1	1.15758e-08	43.2142
Thelodontiformes	Boothialepididae	Boothialepis throsteinssoni	[35]	transitional	0.92	0.75	0.98	1.24468	0.333333	0.189817	1.37252	0.42735	0.145299	2.82051	Abrasive	7	0.0102901	7	1	18.4	Abrasive	6	7.05434e-08	51.334
Thelodontiformes	Boothialepididae	Boothialepis throsteinssoni	[35]	trunk	0.92	0.93	0.98	1.04274	0.47541	0.326665	1.38609	0.680328	0.377049	3.06557	Abrasive	7	0.730064	7	0.999906	4.4222	Hydrodynamic	5	8.93145e-05	23.0687
Thelodontiformes	Turiniidae	Turinia pagei	[36]	head	0.92	0.74	0.99	1.01286	0	0	1.30563	0	0	3.21587	Abrasive	6	0.891884	7	1	2.92465	Bioluminescent	1	8.61581e-10	44.6692
Thelodontiformes	Turiniidae	Turinia pagei	[36]	transitional	0.81	0.6	1	2.01439	0	0	1.82782	0	0	2.04821	Abrasive	6	0.0168498	7	0.9997	17.086	Bioluminescent	3	0.000262147	33.5786
Thelodontiformes	Turiniidae	Turinia pagei	[36]	trunk	0.83	0.56	1	1.72327	0	0	1.42723	0	0	2.48759	Abrasive	6	0.842017	7	0.999999	3.43542	Bioluminescent	3	1.35501e-06	30.4588
Thelodontiformes	Turiniidae	Turinia antarctica	[37]	head	0.92	0.68	0.99	1.31783	0	0	0.984733	0	0	3.24706	Abrasive	6	0.54444	7	1	5.95989	Bioluminescent	1	1.55534e-11	55.7334
Thelodontiformes	Turiniidae	Turinia antarctica	[37]	transitional	0.88	0.76	0.98	1.2657	0	0	1.67834	0	0	2.5916	Abrasive	6	0.433179	7	0.999998	6.95883	Bioluminescent	1	2.21424e-06	33
Thelodontiformes	Turiniidae	Turinia antarctica	[37]	trunk	0.83	0.61	0.98	1.65517	0	0	1.51318	0	0	2.46528	Abrasive	6	0.821722	7	0.999999	3.62584	Bioluminescent	1	4.32696e-07	32.9323
Thelodontiformes	Turiniidae	Turinia australiensis	[14]	head	0.94	0.9	0.99	1.1	0	0	1.23084	0	0	3.13636	Abrasive	6	0.70788	7	1	4.60632	Bioluminescent	1	4.54177e-10	47.6314
Thelodontiformes	Turiniidae	Turinia australiensis	[14]	transitional	0.91	0.76	0.98	1.14679	0	0	1.13052	0	0	3.256	Abrasive	6	0.811803	7	1	3.71638	Bioluminescent	1	2.10062e-10	48.2836
Thelodontiformes	Turiniidae	Turinia australiensis	[14]	trunk	0.93	0.86	0.98	1.18182	0	0	1.33431	0	0	2.93269	Abrasive	6	0.644655	7	1	5.12547	Bioluminescent	1	9.01086e-09	42.1751
Thelodontiformes	Turiniidae	Turinia barentsia	[38]	transitional	0.77	0.54	0.98	1.50345	0	0	1.92065	0	0	2.38532	Abrasive	6	0.127827	7	0.999882	11.2562	Bioluminescent	1	9.88053e-05	29.7007
Thelodontiformes	Turiniidae	Turinia barentsia	[38]	trunk	0.84	0.6	0.98	1.70543	0	0	1.28069	0	0	2.62273	Abrasive	6	0.924835	7	1	2.52982	Bioluminescent	3	6.81052e-08	35.5342
Thelodontiformes	Turiniidae	Turinia composita	[39]	trunk	0.41	0.45	0.86	2.38776	0.649573	1.80669	1.79324	0.948718	0.641026	2.66667	Generalized	8	0.00293207	7	1	21.6381	Abrasive	7	6.02548e-11	68.703
Thelodontiformes	Turiniidae	Turinia composita	[39]	transitional	0.8	0.54	0.96	1.62	0	0	1.26444	0	0	2.77778	Abrasive	6	0.967725	7	1	1.84896	Bioluminescent	3	1.89168e-07	32.8102
Thelodontiformes	Turiniidae	Turinia composita	[39]	trunk	0.9	0.77	0.97	1.54717	0	0	1.66195	0	0	2.32927	Abrasive	6	0.0697494	7	0.99998	13.0983	Bioluminescent	1	1.99068e-05	34.7472
Thelodontiformes	Turiniidae	Turinia fuscina	[40]	unknown	0.46	0.56	0.85	2.13043	1	3.20181	1.50289	1	0	2.91156	Defensive	4	2.36655e-07	7	1	43.7712	Generalized	8	2.07076e-08	79.1567
Thelodontiformes	Turiniidae	Turinia gavinyoungi	[41]	head	0.77	0.59	0.93	1.15179	0	0	1.55757	0	0	3.02326	Abrasive	6	0.998427	7	0.999991	0.687886	Bioluminescent	1	9.17807e-06	23.8853
Thelodontiformes	Turiniidae	Turinia gavinyoungi	[41]	transitional	0.84	0.63	0.97	1.34545	0	0	1.49839	0	0	2.72973	Abrasive	6	0.981584	7	1	1.52072	Bioluminescent	1	2.81061e-07	31.6901
Thelodontiformes	Turiniidae	Turinia gavinyoungi	[42]	trunk	0.54	0.47	0.84	2.00826	1	4.01803	2.00075	1	0	2.40741	Defensive	4	0.0371802	7	1	14.9093	Generalized	8	0	122.285
Thelodontiformes	Turiniidae	Turinia gondwana	[43]	head/transitional	0.86	0.6	0.97	1.5	0	0	1.18926	0	0	2.86111	Abrasive	6	0.930968	7	1	2.44791	Bioluminescent	1	4.05157e-09	41.0962
Thelodontiformes	Turiniidae	Turinia gondwana	[43]	trunk	0.87	0.67	0.97	1.44444	0.512821	0.502197	1.32203	0.448718	-0.217949	2.74359	Abrasive	7	4.17633e-05	7	1	31.9347	Hydrodynamic	5	1.34929e-11	81.9924
Thelodontiformes	Turiniidae	Turinia gondwana	[43]	trunk	0.42	0.4	0.87	2.57377	0.77707	2.48522	1.5991	1	0.350318	2.70701	Generalized	8	0.00055894	7	1	25.7467	Abrasive	7	1.57249e-09	66.2879
Thelodontiformes	Turiniidae	Turinia hutkensis	[44]	head/transitional	0.9	0.67	0.99	1.35754	0	0	1.29498	0	0	2.81893	Abrasive	6	0.91166	7	1	2.69564	Bioluminescent	1	2.53333e-09	42.2831
Thelodontiformes	Turiniidae	Turinia hutkensis	[44]	trunk	0.89	0.67	0.98	1.4593	0	0	1.4321	0	0	2.59761	Abrasive	6	0.732956	7	1	4.39805	Bioluminescent	1	9.57195e-08	36.7217
Thelodontiformes	Turiniidae	Turinia nachoi	[36]	head	0.94	0.82	0.98	1.08491	0	0	1.2623	0	0	3.12174	Abrasive	6	0.615249	7	1	5.36718	Bioluminescent	1	2.01379e-09	45.4137
Thelodontiformes	Turiniidae	Turinia nachoi	[36]	transitional	0.85	0.7	0.97	1.44578	0	0	1.4602	0	0	2.65833	Abrasive	6	0.944391	7	1	2.25499	Bioluminescent	1	2.57015e-07	32.6033
Thelodontiformes	Turiniidae	Turinia nachoi	[36]	trunk	0.62	0.53	0.91	2.08333	1	3.07579	1.47638	1	0	2.56	Defensive	4	2.48427e-06	7	1	38.4534	Abrasive	7	1.85531e-08	74.0587
Thelodontiformes	Turiniidae	Turinia pagoda	[45]	trunk	0.85	0.65	0.98	1.4094	0	0	1.34877	0	0	2.78571	Abrasive	6	0.994609	7	1	1.01342	Bioluminescent	1	1.23221e-08	37.4372
Thelodontiformes	Turiniidae	Turinia polita	[21]	head	0.94	0.87	0.98	0.935897	0	0	1.3205	0	0	3.28767	Abrasive	6	0.643583	7	1	5.13426	Bioluminescent	1	2.78838e-09	44.5299
Thelodontiformes	Turiniidae	Turinia polita	[21]	transitional	0.87	0.66	0.98	1.5303	0	0	1.35708	0	0	2.63366	Abrasive	6	0.90951	7	1	2.72157	Bioluminescent	1	2.9828e-08	37.3772
Thelodontiformes	Turiniidae	Turinia polita	[21]	trunk	0.82	0.54	0.97	1.93333	0	0	1.48746	0	0	2.31034	Abrasive	6	0.497191	7	0.999996	6.3707	Bioluminescent	1	2.33971e-06	32.3017
Thelodontiformes	Turiniidae	Arianalepis megacostata	[46]	head	0.8	0.81	0.93	1.06416	0.255717	0.07062	1.01485	0.361746	0.178794	3.81289	Abrasive	6	0.000160353	7	0.999984	28.755	Abrasive	7	1.55028e-05	50.9039
Thelodontiformes	Turiniidae	Arianalepis megacostata	[46]	trunk	0.9	0.7	0.98	1.40683	0.388521	0.29377	1.38336	0.476821	0.147903	2.68653	Abrasive	7	0.0723131	7	1	12.9916	Hydrodynamic	5	5.12853e-10	55.7737
Thelodontiformes	Turiniidae	Australolepis seddoni	[47]	head	0.93	0.88	0.98	1.13305	0	0	1.38976	0	0	2.93561	Abrasive	6	0.615413	7	1	5.36582	Bioluminescent	1	1.83389e-08	40.9943
Thelodontiformes	Turiniidae	Australolepis seddoni	[46]	transitional	0.56	0.98	0.8	1.21414	1	2.30661	1.89979	1	0	3.10815	Defensive	4	0.00736316	7	1	19.2768	Abrasive	7	3.6968e-12	71.9239
Thelodontiformes	Turiniidae	Australolepis seddoni	[47]	trunk	0.65	0.68	0.89	1.54562	1	2.15388	1.39354	1	0	2.99528	Defensive	4	8.63502e-09	7	0.703653	51.1369	Abrasive	7	0.286502	52.934
Thelodontiformes	Turiniidae	Jesslepis johnsoni	[41]	head	0.91	0.78	0.97	1.25301	0	0	1.26074	0	0	2.95673	Abrasive	6	0.763899	7	1	4.13675	Bioluminescent	1	8.08065e-09	41.4043
Thelodontiformes	Turiniidae	Jesslepis johnsoni	[41]	transitional	0.83	0.54	0.99	1.7554	0	0	1.46341	0	0	2.42213	Abrasive	6	0.787704	7	0.999999	3.93087	Bioluminescent	3	8.66385e-07	31.8487
Thelodontiformes	Turiniidae	Jesslepis johnsoni	[41]	trunk	0.85	0.58	0.98	1.46154	0	0	1.45306	0	0	2.64474	Abrasive	6	0.959251	7	1	2.0106	Bioluminescent	1	8.70361e-08	34.5245
Thelodontiformes	Turiniidae	Boreania minima	[39]	head	0.96	0.9	0.99	1.04301	0	0	1.161	0	0	3.29897	Abrasive	6	0.483487	7	1	6.49313	Bioluminescent	1	1.39897e-10	51.8734
Thelodontiformes	Turiniidae	Boreania minima	[39]	transitional	0.91	0.69	0.99	1.34	0	0	1.34349	0	0	2.76866	Abrasive	6	0.824071	7	1	3.60417	Bioluminescent	1	5.88504e-09	41.5059
Thelodontiformes	Turiniidae	Boreania minima	[39]	trunk	0.86	0.63	0.98	1.45833	0	0	1.50943	0	0	2.57857	Abrasive	6	0.856665	7	1	3.29275	Bioluminescent	1	2.44996e-07	33.7368
Thelodontiformes	Turiniidae	Woodfjordia collisa	[48]	rostral	0.89	0.76	0.94	1.17279	0.294671	0.138944	1.36441	0.482759	0.206897	2.97179	Abrasive	7	0.0018674	7	0.999999	22.7723	Generalized	8	7.46141e-07	50.989
Thelodontiformes	Turiniidae	Woodfjordia collisa	[48]	cephalo-pectoral	0.89	0.66	0.99	1.23575	0.136268	0.0274358	1.19563	0.21174	0.121593	3.09644	Abrasive	6	0.106206	7	1	11.8324	Bioluminescent	1	3.10886e-10	55.6156
Thelodontiformes	Turiniidae	Woodfjordia collisa	[48]	postpectoral	0.92	0.77	0.99	1.34534	0	0	1.28005	0	0	2.80787	Abrasive	6	0.770403	7	1	4.08099	Bioluminescent	1	2.35293e-09	43.8162
Thelodontiformes	Barlowodide	Barlowodus excelsus	[5]	head/transitional	0.8	0.72	0.94	1.08889	0	0	1.18648	0	0	3.48299	Abrasive	6	0.896425	7	1	2.87382	Bioluminescent	1	7.41268e-09	40.314
Thelodontiformes	Barlowodide	Barlowodus excelsus	[5]	trunk	0.64	0.93	0.85	1.22105	1	2.18628	1.79049	1	0	2.98707	Defensive	4	0.000125238	7	1	29.3435	Abrasive	7	1.98077e-08	64.8179
Thelodontiformes	Barlowodide	Barlowodus floralis	[5]	head/transitional	0.89	0.91	0.97	0.973262	0	0	1.28039	0	0	3.36813	Abrasive	6	0.956284	7	1	2.06278	Bioluminescent	1	2.68247e-09	41.5358
Thelodontiformes	Barlowodide	Barlowodus floralis	[5]	trunk	0.63	0.73	0.86	1.74359	1	3.30785	1.89715	1	0	2.45588	Defensive	4	0.034617	7	1	15.1098	Abrasive	7	0	98.1248
Thelodontiformes	Barlowodide	Barlowodus tridens	[5]	trunk	0.4	0.47	0.84	2.15625	0.666667	1.73443	1.80984	1	0.507246	2.85507	Generalized	8	0.0027425	7	1	21.807	Abrasive	7	1.62958e-12	76.0924
Thelodontiformes	Nikoliviidae	Nikolivia oervigi	[21]	unknown	0.61	0.51	0.88	2.27586	1	3.60149	1.58247	1	0	2.39394	Defensive	4	0.00028739	7	1	27.357	Abrasive	7	4.328e-16	98.1095
Thelodontiformes	Nikoliviidae	Nikolivia aligera	[39]	head	0.93	0.9	0.97	1.01818	0	0	1.31008	0	0	3.17857	Abrasive	6	0.636823	7	1	5.18972	Bioluminescent	1	8.37429e-09	42.3859
Thelodontiformes	Nikoliviidae	Nikolivia aligera	[39]	head	0.68	0.96	0.86	1.23077	1	2.41509	1.96226	1	0	2.775	Defensive	4	0.00119003	7	1	23.8924	Hydrodynamic	5	1.09901e-11	74.3605
Thelodontiformes	Nikoliviidae	Nikolivia aligera	[39]	transitional	0.69	0.76	0.87	1.33333	1	2.4726	1.85445	1	0	2.71053	Defensive	4	0.000516778	7	1	25.9375	Hydrodynamic	5	1.15996e-10	71.6925
Thelodontiformes	Nikoliviidae	Nikolivia aligera	[39]	trunk	0.7	0.64	0.9	1.66279	1	3.02142	1.81708	1	0	2.44056	Defensive	4	0.000940777	7	1	24.4722	Hydrodynamic	5	1.52809e-13	83.4914
Thelodontiformes	Nikoliviidae	Nikolivia aligera	[39]	trunk	0.91	0.77	0.99	1.2381	0	0	1.38716	0	0	2.82692	Abrasive	6	0.848188	7	1	3.37592	Bioluminescent	1	7.83814e-09	40.7044
Thelodontiformes	Nikoliviidae	Nikolivia auriculata	[5]	head/transitional	0.92	0.92	0.97	0.932432	0	0	1.43427	0	0	3.2029	Abrasive	6	0.688683	7	1	4.76445	Bioluminescent	1	4.06256e-08	38.8022
Thelodontiformes	Nikoliviidae	Nikolivia auriculata	[5]	trunk	0.66	0.87	0.87	1.21918	1	1.97877	1.62303	1	0	3.10112	Defensive	4	4.92558e-07	7	0.998657	42.1222	Abrasive	7	0.000985444	55.9644
Thelodontiformes	Nikoliviidae	Nikolivia auriculata	[5]	trunk	0.6	0.72	0.79	1.50667	1	3.07613	2.04168	1	0	2.61062	Defensive	4	0.3105	7	1	8.25674	Hydrodynamic	5	0	105.208
Thelodontiformes	Nikoliviidae	Nikolivia balabayi	[21]	unknown	0.84	0.62	0.99	1.58772	0	0	1.33935	0	0	2.65193	Abrasive	6	0.972134	7	1	1.75533	Bioluminescent	3	6.02078e-08	35.0063
Thelodontiformes	Nikoliviidae	Nikolivia balabayi	[21]	unknown	0.56	0.42	0.9	2.81395	1	4.54972	1.61684	1	0	2.2314	Defensive	4	6.30151e-07	7	1	41.5664	Generalized	8	0	132.983
Thelodontiformes	Nikoliviidae	Nikolivia depressa	[38]	head	0.93	0.84	0.98	1.17204	0	0	1.38276	0	0	2.88991	Abrasive	6	0.596594	7	1	5.52148	Bioluminescent	1	1.93077e-08	41.047
Thelodontiformes	Nikoliviidae	Nikolivia depressa	[38]	transitional	0.9	0.67	0.98	1.31183	0	0	1.23635	0	0	2.94262	Abrasive	6	0.894009	7	1	2.90098	Bioluminescent	1	2.20831e-09	42.763
Thelodontiformes	Nikoliviidae	Nikolivia depressa	[38]	trunk	0.89	0.64	0.99	1.53061	0	0	1.30527	0	0	2.66667	Abrasive	6	0.860771	7	1	3.25182	Bioluminescent	1	5.64723e-09	41.236
Thelodontiformes	Nikoliviidae	Nikolivia gutta	[38]	head	0.93	0.86	0.98	1.18605	0	0	1.34788	0	0	2.91176	Abrasive	6	0.628129	7	1	5.26113	Bioluminescent	1	1.14946e-08	41.8239
Thelodontiformes	Nikoliviidae	Nikolivia gutta	[38]	transitional/trunk	0.8	0.61	0.97	1.73563	0	0	1.39355	0	0	2.54967	Abrasive	6	0.931216	7	0.999998	2.44453	Bioluminescent	3	1.63191e-06	29.096
Thelodontiformes	Nikoliviidae	Chattertonodus cometoides	[5]	transitional	0.96	0.9	0.99	1.14286	0	0	1.1436	0	0	3.16071	Abrasive	6	0.446993	7	1	6.82812	Bioluminescent	1	1.6097e-10	51.9277
Thelodontiformes	Nikoliviidae	Chattertonodus cometoides	[5]	trunk	0.9	0.69	0.99	1.52941	0	0	1.29277	0	0	2.65385	Abrasive	6	0.793165	7	1	3.88287	Bioluminescent	1	5.11234e-09	42.0661
Thelodontiformes	Nikoliviidae	Chattertonodus cometoides	[5]	trunk	0.63	0.54	0.88	1.925	1	3.47402	1.80469	1	0	2.39827	Defensive	4	0.00674218	7	1	19.5058	Abrasive	7	0	98.4054
Thelodontiformes	Talivaliidae	Talivalia elongata	[5]	head	0.66	0.9	0.85	1.1619	1	2.1333	1.83603	1	0	2.98361	Defensive	4	0.000118645	7	1	29.4719	Hydrodynamic	5	1.47024e-08	65.5425
Thelodontiformes	Talivaliidae	Talivalia elongata	[5]	transitional	0.62	0.46	0.93	2.21127	1	3.62859	1.64095	1	0	2.36306	Defensive	4	1.56843e-05	7	1	34.2173	Abrasive	7	6.39265e-14	94.9794
Thelodontiformes	Talivaliidae	Talivalia elongata	[5]	trunk	0.49	0.32	0.92	2.80357	1	4.90235	1.74861	1	0	2.29936	Defensive	4	1.15021e-09	7	1	55.5684	Generalized	8	0	147.823
Thelodontiformes	Talivaliidae	Talivalia svalbardia	[48]	rostral	0.66	0.68	0.8	1.38793	0.549689	0.78061	1.86136	0.635093	0.161491	2.71429	Abrasive	7	0.00227091	7	0.999863	22.2821	Generalized	8	0.000137152	40.0707
Thelodontiformes	Talivaliidae	Talivalia svalbardia	[48]	cephalo-pectoral	0.55	0.57	0.79	1.53587	0.727007	1.63776	2.01751	0.989781	0.486131	2.71387	Generalized	8	0.153793	7	1	10.6675	Abrasive	7	1.19422e-07	42.5487
Thelodontiformes	Talivaliidae	Talivalia svalbardia	[48]	postpectoral	0.66	0.41	0.98	2.32143	0.588462	1.08859	1.35417	0.940769	0.232308	2.44385	Generalized	8	0.0462086	7	1	14.293	Abrasive	7	3.61669e-07	43.9581
Thelodontiformes	Talivaliidae	Talivalia svalbardia	[48]	precaudal	0.73	0.45	0.99	2.27293	0.643701	1.29065	1.37042	0.930118	0.790354	2.35236	Generalized	8	0.438581	7	0.999346	6.90744	Abrasive	7	0.000637014	21.6236
Thelodontiformes	Talivaliidae	Talivalia svalbardia	[48]	pinnal	0.56	0.47	0.86	2.23598	0.735632	2.13127	1.76136	1.00627	0.621735	2.39707	Generalized	8	0.260404	7	1	8.89335	Abrasive	7	1.89866e-08	44.4524
Thelodontiformes	Talivaliidae	Glacialepis corpulenta	[5]	transitional	0.85	0.56	0.98	1.75	0	0	1.32356	0	0	2.53571	Abrasive	6	0.841817	7	1	3.43734	Bioluminescent	3	4.71188e-08	37.1785
Thelodontiformes	Talivaliidae	Glacialepis corpulenta	[5]	trunk	0.56	0.38	0.95	2.68852	1	4.09002	1.52129	1	0	2.34146	Defensive	4	5.50341e-09	7	1	52.1303	Generalized	8	2.13947e-13	110.476
Thelodontiformes	Talivaliidae	Amaltheolepis winsnesi	[48]	rostral	0.87	0.8	0.97	1.27778	0	0	1.21447	0	0	3.04348	Abrasive	6	0.968905	7	1	1.82465	Bioluminescent	1	2.63412e-09	41.3341
Thelodontiformes	Talivaliidae	Amaltheolepis winsnesi	[48]	cephalo-pectoral	0.68	0.74	0.89	1.3875	1	2.10976	1.52055	1	0	2.95495	Defensive	4	1.15267e-07	7	0.991018	45.3824	Abrasive	7	0.0066789	55.3819
Thelodontiformes	Talivaliidae	Amaltheolepis winsnesi	[48]	postpectoral	0.37	0.4	0.68	2.29339	1	5.56001	2.42436	1	0	2.46426	Defensive	4	1.07315e-09	7	1	55.7202	Generalized	8	0	247.231
Thelodontiformes	Talivaliidae	Amaltheolepis winsnesi	[48]	precaudal	0.43	0.45	0.71	2.21808	1	5.23282	2.35917	1	0	2.50906	Defensive	4	1.05012e-06	7	1	40.411	Generalized	8	0	220.914
Thelodontiformes	Talivaliidae	Amaltheolepis winsnesi	[48]	pinnal	0.36	0.42	0.7	2.13758	1	5.4722	2.56	1	0	2.52265	Defensive	4	4.71654e-08	7	1	47.375	Generalized	8	0	237.281
Thelodontiformes	Talivaliidae	Amaltheolepis baltica	[21]	unknown	0.49	0.77	0.69	1.32895	1	3.35449	2.52417	1	0	2.77228	Defensive	4	0.72399	7	1	4.4728	Generalized	8	0	152.151
Thelodontiformes	Talivaliidae	Amaltheolepis bystrovi	[21]	unknown	0.87	0.63	0.98	1.54237	0.373626	0.290744	1.35035	0.494505	0.197802	2.62637	Abrasive	7	0.0891566	7	1	12.3657	Generalized	8	5.69793e-09	50.332
Thelodontiformes	Talivaliidae	Amaltheolepis bystrovi	[21]	unknown	0.58	0.37	0.95	2.65385	1	3.90726	1.4723	1	0	2.35507	Defensive	4	1.05359e-08	7	1	50.6976	Generalized	8	2.68742e-12	103.982
Thelodontiformes	Talivaliidae	Amaltheolepis austfjordia	[48]	rostral	0.77	0.57	0.99	1.88367	0.283315	0.214671	1.4198	0.347779	0.126219	2.46641	Abrasive	6	3.10409e-05	7	0.9114	32.6289	Abrasive	7	0.0885165	37.2925
Thelodontiformes	Talivaliidae	Amaltheolepis austfjordia	[48]	cephalo-pectoral	0.44	0.58	0.77	2	1	3.54633	1.77316	1	0	2.83396	Defensive	4	0.00837385	7	1	18.9411	Generalized	8	0	97.8405
Thelodontiformes	Talivaliidae	Amaltheolepis austfjordia	[48]	postpectoral	0.44	0.39	0.78	2.1559	1	4.37651	2.03002	1	0	2.54463	Defensive	4	0.00693888	7	1	19.4311	Generalized	8	0	137.38
Thelodontiformes	Talivaliidae	Amaltheolepis austfjordia	[48]	precaudal	0.39	0.26	0.83	3.70629	1	6.78699	1.83121	1	0	2.18491	Defensive	4	2.22213e-24	7	1	127.374	Generalized	8	0	290.278
Thelodontiformes	Talivaliidae	Amaltheolepis austfjordia	[48]	pinnal	0.46	0.76	0.74	1.38589	1	2.62778	1.8961	1	0	3.24251	Defensive	4	0.0492094	7	1	14.1129	Generalized	8	1.98759e-15	81.8166
Thelodontiformes	Talivaliidae	Amaltheolepis montiwatsonia	[48]	rostral	0.93	0.77	0.99	1.24786	0.229452	0.0863498	1.31435	0.498858	0.372146	3.15639	Abrasive	7	6.55415e-06	7	0.99994	36.2319	Generalized	8	5.94325e-05	55.6931
Thelodontiformes	Talivaliidae	Amaltheolepis montiwatsonia	[48]	cephalo-pectoral	0.9	0.68	0.99	1.2464	0.228902	0.0869266	1.33106	0.505202	0.381503	2.89711	Abrasive	7	2.4575e-06	7	0.999701	38.4781	Generalized	8	0.000297986	54.7145
Thelodontiformes	Talivaliidae	Amaltheolepis montiwatsonia	[48]	postpectoral	0.6	0.4	0.91	2.35118	0.773061	2.3431	1.66754	0.908144	0.417213	2.34813	Generalized	8	0.000761472	7	0.986234	24.9914	Abrasive	7	0.0137616	33.5354
Thelodontiformes	Talivaliidae	Amaltheolepis montiwatsonia	[48]	precaudal	0.7	0.4	0.99	2.3747	0.759799	1.7816	1.29958	0.937688	0.297487	2.41307	Generalized	8	0.0156178	7	0.823792	17.2902	Abrasive	7	0.175601	20.3816
Thelodontiformes	Talivaliidae	Amaltheolepis montiwatsonia	[48]	pinnal	0.75	0.58	0.99	1.76231	0.513973	0.596388	1.28105	0.987849	0.650061	2.87606	Generalized	8	1.80045e-05	7	1	33.8972	Abrasive	7	2.13068e-09	73.8309
Thelodontiformes	Apalolepididae	Apalolepis obruchevi	[21]	head/transitional	0.92	0.91	0.97	1.23438	0	0	1.30108	0	0	2.92405	Abrasive	6	0.645412	7	1	5.11926	Bioluminescent	1	1.63122e-08	40.982
Thelodontiformes	Apalolepididae	Apalolepis obruchevi	[21]	trunk	0.84	0.84	0.96	1.28226	0.662893	0.877437	1.55723	0.942138	0.524528	2.90566	Hydrodynamic	5	0.588874	7	0.891701	5.58565	Generalized	8	0.0815399	10.3697
Thelodontiformes	Apalolepididae	Apalolepis angelica	[38]	unknown	0.89	0.68	0.99	1.47059	0.734	1.04633	1.32064	1	0.55	2.7	Hydrodynamic	5	0.942743	7	0.998661	2.27986	Abrasive	7	0.000850443	16.4167
Thelodontiformes	Apalolepididae	Apalolepis brotzeni	[21]	head/transitional	0.94	0.9	0.97	1.15217	0	0	1.21961	0	0	3.07547	Abrasive	6	0.467148	7	1	6.64138	Bioluminescent	1	3.71676e-09	45.4622
Thelodontiformes	Apalolepididae	Apalolepis brotzeni	[21]	trunk	0.95	0.85	0.98	1.19672	0.821918	1.01983	1.26147	1	0.438356	2.9726	Hydrodynamic	5	0.537562	7	0.999925	6.01875	Abrasive	7	7.49915e-05	25.0149
Thelodontiformes	Apalolepididae	Apalolepis toombsi	[49]	unknown	0.9	0.67	0.99	1.47423	0	0	1.52136	0	0	2.4965	Abrasive	6	0.477314	7	1	6.54883	Bioluminescent	1	1.79104e-07	37.6194
Thelodontiformes	Apalolepididae	Gampsolepis insueta	[21]	unknown	0.9	0.75	0.97	1	0	0	1.06869	0	0	3.60606	Abrasive	6	0.676525	7	1	4.86425	Bioluminescent	1	1.00938e-10	50.8973
Thelodontiformes	Apalolepididae	Gampsolepis insueta	[21]	unknown	0.45	0.7	0.73	1.37143	1	2.21113	1.61228	1	0	3.5625	Defensive	4	2.62824e-05	7	1	33.0171	Generalized	8	6.3735e-09	70.7594
Thelodontiformes	incertae sedis	Skamolepis fragilis	[21]	unknown	0.97	0.94	1	1.10465	0.757895	0.845126	1.33192	1	0.378947	2.97895	Hydrodynamic	5	0.998826	7	0.999973	0.628679	Abrasive	7	2.69078e-05	21.6748
incertae sedis	Oeseliidae	Oeselia mosaica	[50]	head	0.93	0.88	0.98	1.08377	0	0	1.50623	0	0	2.87923	Abrasive	6	0.448265	7	1	6.8162	Bioluminescent	1	1.02526e-07	39.0025
incertae sedis	Oeseliidae	Oeselia mosaica	[50]	transitional	0.96	0.84	0.99	1.09884	0	0	1.4261	0	0	2.88889	Abrasive	6	0.296378	7	1	8.42789	Bioluminescent	1	1.44762e-08	44.5294
incertae sedis	Oeseliidae	Oeselia mosaica	[50]	trunk	0.94	0.86	0.99	1.12632	0	0	1.44919	0	0	2.85981	Abrasive	6	0.485079	7	1	6.47882	Bioluminescent	1	1.90584e-08	42.0303
incertae sedis	Longodidae	Longodus acicularis	[22]	head	0.77	0.45	0.99	2.74107	0	0	1.3642	0	0	2.09121	Bioluminescent	3	0.0157204	7	0.500479	17.2726	Abrasive	6	0.499521	17.2765
incertae sedis	Longodidae	Longodus acicularis	[22]	transitional	0.31	0.17	0.97	7.32727	0.138131	0.196009	1.40202	0.205128	0.133995	1.9909	Bioluminescent	2	8.54864e-06	7	1	35.6203	Bioluminescent	3	0	127.518
incertae sedis	Longodidae	Longodus acicularis	[22]	trunk	0.25	0.11	0.93	9.0625	0.723372	6.29547	1.32757	0.885824	0.356322	2.05747	Bioluminescent	2	8.67765e-78	7	0.68145	378.725	Defensive	4	0.318546	380.245
incertae sedis	incertae sedis	Thulolepis striaspina	[20]	trunk	0.94	0.86	0.99	1.11184	0	0	1.35179	0	0	2.98225	Abrasive	6	0.639782	7	1	5.16544	Bioluminescent	1	3.55662e-09	44.0743
incertae sedis	incertae sedis	Thulolepis striaspina	[20]	transitional	0.96	0.8	0.99	1.21477	0	0	1.17697	0	0	3.02762	Abrasive	6	0.421859	7	1	7.06776	Bioluminescent	1	3.81477e-10	50.4417
incertae sedis	incertae sedis	Thulolepis striaspina	[20]	trunk	0.88	0.66	0.98	1.41401	0	0	1.14444	0	0	2.97748	Abrasive	6	0.906815	7	1	2.75369	Bioluminescent	1	5.94453e-10	45.2404
incertae sedis	incertae sedis	Sophialepis ancorata	[5]	head	0.92	0.67	0.99	1.52083	0	0	1.1441	0	0	2.80822	Abrasive	6	0.638869	7	1	5.17293	Bioluminescent	1	5.24062e-10	47.9118
incertae sedis	incertae sedis	Sophialepis ancorata	[14]	transitional	0.95	0.86	0.99	1.45833	0	0	1.25801	0	0	2.68095	Abrasive	6	0.329364	7	1	8.03675	Bioluminescent	1	3.7247e-09	46.8533
incertae sedis	incertae sedis	Sophialepis ancorata	[14]	trunk	0.89	0.92	0.97	1	0	0	1.43982	0	0	3.12941	Abrasive	6	0.934985	7	1	2.39231	Bioluminescent	1	4.2412e-08	36.344
Furcacaudiformes	Furcacaudidae	Canonia grossi	[14]	unknown	0.93	0.74	0.99	1.33333	0.732759	0.888138	1.24057	1	0.474138	2.86207	Hydrodynamic	5	0.983338	7	0.999761	1.46976	Abrasive	7	0.000217374	18.3371
Furcacaudiformes	Furcacaudidae	Canonia costulata	[5]	head	0.93	0.8	0.98	1.17476	0.239669	0.0896015	1.32783	0.347107	0.157025	2.94215	Abrasive	7	4.53048e-05	7	0.784805	31.7439	Abrasive	6	0.215195	34.3317
Furcacaudiformes	Furcacaudidae	Canonia costulata	[5]	transitional/trunk	0.94	0.81	0.99	1.2	0.818182	1.08251	1.34756	1	0.545455	2.88636	Hydrodynamic	5	0.651255	7	0.999907	5.07136	Abrasive	7	9.27758e-05	23.6418
Furcacaudiformes	Furcacaudidae	Canonia kaerberi	[39]	unknown	0.87	0.75	0.98	1.31169	0.891089	1.44346	1.3859	1	0.138614	2.82178	Hydrodynamic	5	0.0146514	7	0.997451	17.4614	Abrasive	7	0.00254919	29.4003
