# Supplementary material for: Squamation and ecology of thelodonts
Source: PLoS One. 2017 Feb 27;12(2):e0172781. doi: 10.1371/journal.pone.0172781 (PMC5328365; doi:10.1371/journal.pone.0172781)
Supplement: S16 Table — (XLSX) [file pone.0172781.s016.xlsx]

## Sheet: S16 Table
S16 Table. Estimated percentage of coverage of each morphotype and functional type in all thelodonts known from disarticulated remains and detailed results of the classification after their inclusion in Canonical Variate Analysis-2 (CVA-2, with six ecological groups as defined groups and scale morphotype percentages of coverage on the whole body as discriminant variables).
Order	Family	Species	% of coverage of each funtional type and morphotype								HIGHEST GROUP					SECOND HIGHEST GROUP
			Bioluminescent			Defens.	Hydrod.	Abrasive		General.	Predicted ecological group	Conditional probability [P(D>d | G=g)]		Posterior probability [P(G=g | D=d)]	Squared Mahalanobis distance to centroid	Predicted ecological group	Posterior probability [P(G=g | D=d)]	Squared Mahalanobis distance to centroid
			1	2	3	4	5	6	7	8		p	df
Sandiviiformes	Sandiviidae	Sandivia melinkovi	0	0	0	0	0	100	0	0	Hard substrate	0.356947	5	1	5.50912	Soft substrate	0	121.852
Sandiviiformes	Sandiviidae	Sandivia angusta	0	0	0	0	0	100	0	0	Hard substrate	0.356947	5	1	5.50912	Soft substrate	0	121.852
Sandiviiformes	Stroinolepididae	Stroinolepis maenniki	0	0	0	0	0	100	0	0	Hard substrate	0.356947	5	1	5.50912	Soft substrate	0	121.852
Sandiviiformes	Stroinolepididae	Valyalepis crista	0	0	0	0	0	100	0	0	Hard substrate	0.356947	5	1	5.50912	Soft substrate	0	121.852
Sandiviiformes	Angaralepididae	Angaralepis moskalenkoae	0	0	0	0	0	27.3	72.7	0	Hard substrate	0.3208	5	1	5.85287	Soft substrate	0	99.5715
Loganelliiformes	Loganelliidae	Loganellia aldridgei	0	0	0	0	0	4.6	0	95.4	Open water	1	5	1	9.00599e-05	Soft substrate	1.04325e-13	59.7826
Loganelliiformes	Loganelliidae	Loganellia almgreeni	0	0	0	0	0	27.3	72.7	0	Hard substrate	0.3208	5	1	5.85287	Soft substrate	0	99.5715
Loganelliiformes	Loganelliidae	Loganellia asiatica	0	0	0	0	0	27.3	72.7	0	Hard substrate	0.3208	5	1	5.85287	Soft substrate	0	99.5715
Loganelliiformes	Loganelliidae	Loganellia avonia	0	0	0	0	0	100	0	0	Hard substrate	0.356947	5	1	5.50912	Soft substrate	0	121.852
Loganelliiformes	Loganelliidae	Loganellia einari	0	0	0	0	0	4.6	0	95.4	Open water	1	5	1	9.00599e-05	Soft substrate	1.04325e-13	59.7826
Loganelliiformes	Loganelliidae	Loganellia grossi	0	0	0	0	0	100	0	0	Hard substrate	0.356947	5	1	5.50912	Soft substrate	0	121.852
Loganelliiformes	Loganelliidae	Loganellia incompta	0	0	0	0	0	100	0	0	Hard substrate	0.356947	5	1	5.50912	Soft substrate	0	121.852
Loganelliiformes	Loganelliidae	Loganellia matura	0	0	0	0	0	95.4	4.6	0	Hard substrate	0.523195	5	1	4.18433	Soft substrate	0	119.096
Loganelliiformes	Loganelliidae	Loganellia sibirica	0	0	0	0	0	100	0	0	Hard substrate	0.356947	5	1	5.50912	Soft substrate	0	121.852
Loganelliiformes	Loganelliidae	Loganellia tuvaensis	0	0	0	0	0	100	0	0	Hard substrate	0.356947	5	1	5.50912	Soft substrate	0	121.852
Loganelliiformes	Loganelliidae	Talimaalepis rimae	0	0	0	0	0	4.6	0	95.4	Open water	1	5	1	9.00599e-05	Soft substrate	1.04325e-13	59.7826
Loganelliiformes	Loganelliidae	Talimaalepis kadvoiensis	0	0	0	0	0	4.6	0	95.4	Open water	1	5	1	9.00599e-05	Soft substrate	1.04325e-13	59.7826
Shieliiformes	Shieliidae	Shielia multispinata	0	0	0	72.7	0	27.3	0	0	Schooling	4.30449e-25	5	1	124.072	Soft substrate	0	1283.61
Shieliiformes	Shieliidae	Shielia parca	0	0	0	65.4	0	34.6	0	0	Schooling	1.95772e-46	5	1	224.109	Soft substrate	0	1035.24
Shieliiformes	Shieliidae	Paralogania kummerowi	0	0	0	0	0	100	0	0	Hard substrate	0.356947	5	1	5.50912	Soft substrate	0	121.852
Shieliiformes	Shieliidae	Paralogania borealis	0	0	0	0	0	100	0	0	Hard substrate	0.356947	5	1	5.50912	Soft substrate	0	121.852
Shieliiformes	Shieliidae	Paralogania consimilis	0	0	0	72.7	0	27.3	0	0	Schooling	4.30449e-25	5	1	124.072	Soft substrate	0	1283.61
Shieliiformes	Shieliidae	Paralogania ex gr. martinssoni	0	0	0	72.7	0	27.3	0	0	Schooling	4.30449e-25	5	1	124.072	Soft substrate	0	1283.61
Shieliiformes	Shieliidae	Paralogania foliala	0	0	0	0	0	100	0	0	Hard substrate	0.356947	5	1	5.50912	Soft substrate	0	121.852
Shieliiformes	Shieliidae	Paralogania kaarmisensis	0	0	0	72.7	0	27.3	0	0	Schooling	4.30449e-25	5	1	124.072	Soft substrate	0	1283.61
Shieliiformes	Shieliidae	Paralogania kachanovi	0	0	0	0	0	100	0	0	Hard substrate	0.356947	5	1	5.50912	Soft substrate	0	121.852
Shieliiformes	Shieliidae	Paralogania ludlowiensis	0	0	0	100	0	0	0	0	Schooling	0.0606569	5	1	10.5677	Open water	0	2414.13
Shieliiformes	Shieliidae	Paralogania martinssoni	0	0	0	0	0	0	4.6	95.4	Open water	0.999865	5	1	0.0927564	Soft substrate	5.29261e-14	61.2325
Shieliiformes	Shieliidae	Paralogania perensae	0	0	0	72.7	0	27.3	0	0	Schooling	4.30449e-25	5	1	124.072	Soft substrate	0	1283.61
Shieliiformes	Shieliidae	Paralogania readbayensis	0	0	0	72.7	0	22.7	4.6	0	Schooling	6.69067e-25	5	1	123.168	Soft substrate	0	1283.92
Shieliiformes	Shieliidae	Paralogania tarranti	0	0	0	0	0	100	0	0	Hard substrate	0.356947	5	1	5.50912	Soft substrate	0	121.852
Shieliiformes	Shieliidae	Paralogania wilsoni	0	0	0	0	0	100	0	0	Hard substrate	0.356947	5	1	5.50912	Soft substrate	0	121.852
Shieliiformes	Shieliidae	Valiukia flabellata	0	0	0	0	0	27.3	72.7	0	Hard substrate	0.3208	5	1	5.85287	Soft substrate	0	99.5715
Shieliiformes	Shieliidae	Nethertonodus prodigialis	0	0	0	72.7	0	27.3	0	0	Schooling	4.30449e-25	5	1	124.072	Soft substrate	0	1283.61
Shieliiformes	Shieliidae	Praetrilogania grabion	0	0	0	0	72.7	27.3	0	0	Strong-swimming	5.57663e-13	5	1	66.4606	Hard substrate	0	597.633
Phlebolepidiformes	Phlebolepididae	Phlebolepis ornata	0	0	0	0	0	27.3	72.7	0	Hard substrate	0.3208	5	1	5.85287	Soft substrate	0	99.5715
Phlebolepidiformes	Phlebolepididae	Helenolepis navicularis	0	0	0	0	0	100	0	0	Hard substrate	0.356947	5	1	5.50912	Soft substrate	0	121.852
Phlebolepidiformes	Katoporididae	Trimerolepis gemella	0	0	0	0	72.7	27.3	0	0	Strong-swimming	5.57663e-13	5	1	66.4606	Hard substrate	0	597.633
Phlebolepidiformes	Katoporididae	Trimerolepis serrata	0	0	0	72.7	0	27.3	0	0	Schooling	4.30449e-25	5	1	124.072	Soft substrate	0	1283.61
Phlebolepidiformes	Katoporididae	Trimerolepis timanica	0	0	0	0	0	100	0	0	Hard substrate	0.356947	5	1	5.50912	Soft substrate	0	121.852
Phlebolepidiformes	Katoporididae	Trimerolepis tricava	0	0	0	72.7	0	27.3	0	0	Schooling	4.30449e-25	5	1	124.072	Soft substrate	0	1283.61
Phlebolepidiformes	Katoporodidae	Niurolepis susanae	0	0	0	72.7	0	22.7	4.6	0	Schooling	6.69067e-25	5	1	123.168	Soft substrate	0	1283.92
Phlebolepidiformes	Katoporididae	Goniporus alatus	0	0	0	0	0	100	0	0	Hard substrate	0.356947	5	1	5.50912	Soft substrate	0	121.852
Phlebolepidiformes	Katoporididae	Zueguelepis potanus	0	0	0	72.7	0	0	27.3	0	Schooling	1.60691e-24	5	1	121.372	Soft substrate	0	1288.1
Thelodontiformes	Thelodontididae	Thelodus parvidens	0	0	0	0	0	100	0	0	Hard substrate	0.356947	5	1	5.50912	Soft substrate	0	121.852
Thelodontiformes	Thelodontididae	Thelodus sculptilis	0	0	0	0	0	100	0	0	Hard substrate	0.356947	5	1	5.50912	Soft substrate	0	121.852
Thelodontiformes	Thelodontididae	Thelodus trilobatus	0	0	0	0	0	4.6	0	95.4	Open water	1	5	1	9.00599e-05	Soft substrate	1.04325e-13	59.7826
Thelodontiformes	Thelodontididae	Thelodus visvaldi	0	0	0	0	72.7	27.3	0	0	Strong-swimming	5.57663e-13	5	1	66.4606	Hard substrate	0	597.633
Thelodontiformes	Thelodontididae	Parathelodus asiaticus	0	0	0	0	0	100	0	0	Hard substrate	0.356947	5	1	5.50912	Soft substrate	0	121.852
Thelodontiformes	Boothialepididae	Boothialepis throsteinssoni	0	0	0	0	0	4.6	95.4	0	Hard substrate	0.00927295	5	1	15.2689	Soft substrate	0	101.923
Thelodontiformes	Turiniidae	Turinia pagei	0	0	0	0	0	100	0	0	Hard substrate	0.356947	5	1	5.50912	Soft substrate	0	121.852
Thelodontiformes	Turiniidae	Turinia antarctica	0	0	0	0	0	100	0	0	Hard substrate	0.356947	5	1	5.50912	Soft substrate	0	121.852
Thelodontiformes	Turiniidae	Turinia australiensis	0	0	0	0	0	100	0	0	Hard substrate	0.356947	5	1	5.50912	Soft substrate	0	121.852
Thelodontiformes	Turiniidae	Turinia gavinyoungi	0	0	0	72.7	0	0	27.3	0	Schooling	1.60691e-24	5	1	121.372	Soft substrate	0	1288.1
Thelodontiformes	Turiniidae	Turinia hutkensis	0	0	0	0	0	100	0	0	Hard substrate	0.356947	5	1	5.50912	Soft substrate	0	121.852
Thelodontiformes	Turiniidae	Turinia nachoi	0	0	0	72.7	0	0	27.3	0	Schooling	1.60691e-24	5	1	121.372	Soft substrate	0	1288.1
Thelodontiformes	Turiniidae	Turinia polita	0	0	0	0	0	100	0	0	Hard substrate	0.356947	5	1	5.50912	Soft substrate	0	121.852
Thelodontiformes	Turiniidae	Australolepis seddoni	0	0	0	95.4	0	4.6	0	0	Schooling	0.971374	5	1	0.883938	Open water	0	2197.97
Thelodontiformes	Turiniidae	Jesslepis johnsoni	0	0	0	0	0	100	0	0	Hard substrate	0.356947	5	1	5.50912	Soft substrate	0	121.852
Thelodontiformes	Turiniidae	Boreania minima	0	0	0	0	0	100	0	0	Hard substrate	0.356947	5	1	5.50912	Soft substrate	0	121.852
Thelodontiformes	Barlowodide	Barlowodus excelsus	0	0	0	72.7	0	27.3	0	0	Schooling	4.30449e-25	5	1	124.072	Soft substrate	0	1283.61
Thelodontiformes	Barlowodide	Barlowodus floralis	0	0	0	72.7	0	27.3	0	0	Schooling	4.30449e-25	5	1	124.072	Soft substrate	0	1283.61
Thelodontiformes	Nikoliviidae	Nikolivia auriculata	0	0	0	72.7	0	0	27.3	0	Schooling	1.60691e-24	5	1	121.372	Soft substrate	0	1288.1
Thelodontiformes	Nikoliviidae	Nikolivia depressa	0	0	0	0	0	100	0	0	Hard substrate	0.356947	5	1	5.50912	Soft substrate	0	121.852
Thelodontiformes	Nikoliviidae	Nikolivia gutta	0	0	0	0	0	100	0	0	Hard substrate	0.356947	5	1	5.50912	Soft substrate	0	121.852
Thelodontiformes	Talivaliidae	Talivalia elongata	0	0	0	100	0	0	0	0	Schooling	0.0606569	5	1	10.5677	Open water	0	2414.13
Thelodontiformes	Talivaliidae	Talivalia svalbardia	0	0	0	0	0	0	4.6	95.4	Open water	0.999865	5	1	0.0927564	Soft substrate	5.29261e-14	61.2325
Thelodontiformes	Talivaliidae	Amaltheolepis winsnesi	0	0	0	95.4	0	4.6	0	0	Schooling	0.971374	5	1	0.883938	Open water	0	2197.97
Thelodontiformes	Talivaliidae	Amaltheolepis austfjordia	0	0	0	95.4	0	4.6	0	0	Schooling	0.971374	5	1	0.883938	Open water	0	2197.97
Thelodontiformes	Talivaliidae	Amaltheolepis montiwatsonia	0	0	0	0	0	0	27.3	72.7	Open water	0.00479476	5	0.508784	16.8492	Soft substrate	0.491216	16.9195
Thelodontiformes	Apalolepididae	Apalolepis obruchevi	0	0	0	0	72.7	27.3	0	0	Strong-swimming	5.57663e-13	5	1	66.4606	Hard substrate	0	597.633
Thelodontiformes	Apalolepididae	Apalolepis brotzeni	0	0	0	0	72.7	27.3	0	0	Strong-swimming	5.57663e-13	5	1	66.4606	Hard substrate	0	597.633
incertae sedis	Oeseliidae	Oeselia mosaica	0	0	0	0	0	100	0	0	Hard substrate	0.356947	5	1	5.50912	Soft substrate	0	121.852
incertae sedis	Longodidae	Longodus acicularis	0	95.4	4.6	0	0	0	0	0	Bioluminescent	0.875035	5	1	1.80791	Open water	0	1776.41
incertae sedis	incertae sedis	Thulolepis striaspina	0	0	0	0	0	100	0	0	Hard substrate	0.356947	5	1	5.50912	Soft substrate	0	121.852
incertae sedis	incertae sedis	Sophialepis ancorata	0	0	0	0	0	100	0	0	Hard substrate	0.356947	5	1	5.50912	Soft substrate	0	121.852
Furcacaudiformes	Furcacaudidae	Canonia costulata	0	0	0	0	95.4	0	4.6	0	Strong-swimming	0.995377	5	1	0.398279	Hard substrate	0	1023.81
